# Supplementary material for: Environmental pediatrics: an introduction and evaluation of online resources
Source: publisher site journal article supplement (doi:10.1515/reveh-2016-0019), 2016-11-15
Supplement: Supplementary file 1 [file reveh-2016-0019_suppl.doc]

Online supplement:

**Table 2 - Complete results of literature review**

| **Topic** | **Subtopic** | **Sub-subtopic** | **Media** | **Science** | **Totals** | **ChEHC website?** |
| --- | --- | --- | --- | --- | --- | --- |
| **Aboriginal issues** | | | **11** | **14** | **25** | **No** |
| Lead in Nunavik |  |  | 0 | 1 | 1 | No |
| Pollution in 1st Nations traditional diet |  |  | 0 | 1 | 1 | No |
| Pollution on 1st Nations reserves |  |  | 1 | 0 | 1 | No |
| Pollution on Ammjiwnaang reserve |  |  | 7 | 0 | 7 | No |
| Water pollution on 1st Nations reserves |  |  | 3 | 3 | 6 | No |
| Pollution effect on Inuit |  |  | 1 | 9 | 10 | No |
| **Cleaning products** | | | **4** | **1** | **5** | **Yes** |
| NOS |  |  | 2 | 1 | 3 | Yes |
| 2-butoxyethanol |  |  | 1 | 0 | 1 | Can be found on WHO |
| Ethoxylated nonyl phenols |  |  | 1 | 0 | 1 | Can be found on WHO |
| Triclosan |  |  | 1 | 0 | 1 | Yes |
| **Elements (non-metal)** | | | **6** | **11** | **17** | **Yes** |
| Arsenic |  |  | 6 | 6 | 12 | Yes |
| Beryllium |  |  | 0 | 1 | 1 | Can be found on WHO |
| Cobalt |  |  | 0 | 1 | 1 | Can be found on WHO |
| Fluoride |  |  | 1 | 0 | 1 | Can be found on WHO |
| Radon |  |  | 0 | 3 | 3 | Yes |
| Selenium |  |  | 0 | 2 | 2 | Can be found on WHO |
| **Food** | | | **9** | **21** | **30** | **Yes** |
| NOS |  |  | 2 | 2 | 4 | Yes |
| 1,3-butadiene |  |  | 0 | 1 | 1 | Can be found on WHO |
| Acrylamide |  |  | 0 | 1 | 1 | Yes |
| Alternia & alternariol |  |  | 0 | 1 | 1 | No |
| Ammeline & ammelide |  |  | 0 | 1 | 1 | Can be found on WHO |
| Arsenic |  |  | 0 | 1 | 1 | Yes |
| Artificial colouring |  |  | 0 | 1 | 1 | Can be found on WHO |
| Benzene |  |  | 0 | 1 | 1 | Yes |
| Benzo[a]pyrene |  |  | 0 | 1 | 1 | Can be found on WHO |
| Benzoate |  |  | 0 | 1 | 1 | Yes |
| Chromium (hexavalent) |  |  | 0 | 1 | 1 | Can be found on WHO |
| Cyanuric acid |  |  | 0 | 1 | 1 | Can be found on WHO |
| Genetically modified organisms |  |  | 4 | 3 | 7 | Can be found on WHO |
| Melamine |  |  | 0 | 2 | 2 | Yes |
| Mercury in fish |  |  | 5 | 10 | 15 | Yes |
| Polychlorinated biphenyls (PCBs) in fish |  |  | 0 | 1 | 1 | Yes |
| **Topic** | **Subtopic** | **Sub-subtopic** | **Media** | **Science** | **Totals** | **ChEHC website?** |
| **Metals** | | | **28** | **38** | **66** | **Yes** |
| NOS |  |  | 1 | 1 | 2 | Yes |
| Aluminum |  |  | 2 | 3 | 5 | Yes |
| Cadmium |  |  | 2 | 9 | 11 | Can be found on WHO |
| Copper |  |  | 0 | 1 | 1 | Can be found on WHO |
| Lead |  |  | 17 | 25 | 42 | Yes |
| Manganese |  |  | 1 | 3 | 4 | Can be found on WHO |
| Mercury |  |  | 17 | 18 | 35 | Yes |
| Nickel |  |  | 1 | 3 | 4 | Can be found on WHO |
| Uranium |  |  | 3 | 1 | 4 | Can be found on WHO |
| Zinc |  |  | 0 | 1 | 1 | Can be found on WHO |
| **Personal hygeine/cosmetics** | | | **9** | **2** | **11** | **Yes** |
| NOS |  |  | 5 | 1 | 6 | Yes |
| Formaldehyde |  |  | 2 | 0 | 2 | Can be found on WHO |
| Halobenzoquinones |  |  | 0 | 1 | 1 | No |
| Parabens |  |  | 1 | 0 | 1 | Can be found on WHO |
| Toluene |  |  | 1 | 0 | 1 | Can be found on WHO |
| Triclosan |  |  | 2 | 0 | 2 | Yes |
| **Pesticidesa** | | | **21** | **16** | **37** | **Yes** |
| **Plasticsb** | | | **39** | **14** | **53** | **Yes** |
| 2,6-di-isopropylnaphthalene (DIPN) |  |  | 0 | 1 | 1 | No |
| 2,4-di-tert-butyl phenol |  |  | 0 | 1 | 1 | Can be found on WHO |
| Alkane |  |  | 0 | 1 | 1 | Can be found on WHO |
| Benzene |  |  | 0 | 1 | 1 | Yes |
| Bisphenol A (BPA) |  |  | 34 | 12 | 46 | Yes |
| Phtalatesc |  |  | 13 | 8 | 21 | Yes |
| Polypropylene (PP) |  |  | 0 | 1 | 1 | Can be found on WHO |
| Silicone |  |  | 0 | 1 | 1 | Can be found on WHO |
| **Pollution** | | | **39** | **104** | **143** | **Yes** |
| NOS |  |  | 1 | 1 | 2 | Yes |
| Air pollution |  |  | 34 | 87 | 121 | Yes |
|  | NOS |  | 1 | 2 | 3 | Yes |
|  | Benzene |  | 3 | 3 | 6 | Yes |
|  | Benzo[a]pyrene |  | 0 | 1 | 1 | Can be found on WHO |
|  | Chromium (hexavalent) |  | 0 | 2 | 2 | Can be found on WHO |
|  | Cigarettes & Smoke |  | 5 | 27 | 32 | Yes |
|  | Dioxins and dioxin-like substancesd |  | 17 | 25 | 42 | Yes |
| **Topic** | **Subtopic** | **Sub-subtopic** | **Media** | **Science** | **Totals** | **ChEHC website?** |
|  | HEPA filters |  | 3 | 1 | 4 | Can be found on WHO |
|  | Organochlorine & lindane |  | 1 | 0 | 1 | Yes |
|  | Perchlorate & perchloroethylene |  | 2 | 0 | 2 | Yes |
|  | Perfluoro moleculese |  | 4 | 5 | 9 | Yes |
| Indoor air pollutionf |  |  | 5 | 17 | 22 | Yes |
|  | NOS |  | 2 | 13 | 15 | Yes |
|  | Mould |  | 3 | 4 | 7 | Yes |
|  | Ozone |  | 1 | 0 | 1 | Yes |
| Outdoor air pollutiong |  |  | 24 | 44 | 68 | Yes |
|  | NOS |  | 7 | 19 | 26 | Yes |
|  | 1,3-butadiene |  | 0 | 2 | 2 | Can be found on WHO |
|  | Air pollution from oil |  | 5 | 2 | 7 | Yes |
|  | Air pollution in Sarnia, On. & Ammjiwnaang reserve |  | 7 | 1 | 8 | No |
|  | Ammonia & ammonium nitrate |  | 1 | 0 | 1 | Can be found on WHO |
|  | Benzene |  | 3 | 3 | 6 | Yes |
|  | Carbon monoxide |  | 3 | 4 | 7 | Yes |
|  | Chlordane & oxychlordane |  | 0 | 2 | 2 | Can be found on WHO |
|  | Formaldehyde |  | 0 | 1 | 1 | Yes |
|  | Fuel |  | 3 | 5 | 8 | Yes |
|  |  | Biomass fuelsh | 0 | 2 | 2 | Can be found on WHO |
|  |  | Coal | 3 | 1 | 4 | Can be found on WHO |
|  |  | Gas, diesel, exhaust | 1 | 2 | 3 | Yes |
|  | Methanol |  | 1 | 0 | 1 | Can be found on WHO |
|  | Nitrogen moleculesi |  | 3 | 12 | 15 | Yes |
|  | O/m/p-xylene |  | 0 | 1 | 1 | Can be found on WHO |
|  | Ozone |  | 0 | 7 | 7 | Yes |
|  | Phenanthrene |  | 1 | 0 | 1 | No |
|  | Phosphorous |  | 1 | 0 | 1 | Can be found on WHO |
|  | Polycyclic aromatic hydrocarbons (PAH) |  | 3 | 2 | 5 | Yes |
|  | Sulfur moleculesj |  | 2 | 9 | 11 | Yes |
|  | Toluene |  | 1 | 1 | 2 | Yes |
|  | Toxaphene |  | 0 | 1 | 1 | Can be found on WHO |
|  | Trans-nonachlor |  | 0 | 1 | 1 | Can be found on WHO |
|  | Tritium |  | 0 | 1 | 1 | Can be found on WHO |
| Soil pollution |  |  | 4 | 6 | 10 | No |
| Water pollution |  |  | 15 | 27 | 42 | Yes |
|  | NOS |  | 11 | 13 | 24 | Yes |
| **Topic** | **Subtopic** | **Sub-subtopic** | **Media** | **Science** | **Totals** | **ChEHC website?** |
|  | 1,3-butadiene |  | 0 | 1 | 1 | Can be found on WHO |
|  | Arsenic |  | 0 | 1 | 1 | Yes |
|  | Benzene |  | 0 | 1 | 1 | Yes |
|  | Benzo[a]pyrene |  | 0 | 1 | 1 | Can be found on WHO |
|  | Chromium (hexavalent) |  | 0 | 1 | 1 | Can be found on WHO |
|  | Halobenzoquinones |  | 0 | 1 | 1 | No |
|  | Chlorination by-productsk |  | 0 | 1 | 1 | Yes |
|  | Mercury in fish |  | 5 | 10 | 15 | Yes |
|  | Polychlorinated biphenyls (PCBs) in fish |  | 0 | 1 | 1 | Yes |
| Light pollution |  |  | 0 | 1 | 1 | No |
| **Technology** | | | **1** | **1** | **2** | **Yes** |
| Cell phones |  |  | 1 | 0 | 1 | Yes |
| Power lines / Electromagnetic fields |  |  | 1 | 0 | 1 | Yes |
| Nanoparticles |  |  | 0 | 1 | 1 | Can be found on WHO |
| **Miscellaneous** | | | **13** | **5** | **18** | **N/A** |
| Asbestos |  |  | 11 | 3 | 14 | Can be found on WHO |
|  | NOS |  | 3 | 3 | 6 | Yes |
|  | Asbestos in Quebec |  | 6 | 0 | 6 | No |
|  | Asbestos in Sarnia |  | 2 | 0 | 2 | No |
| Azo dyes |  |  | 0 | 1 | 1 | Can be found on WHO |
| Radiation |  |  | 2 | 1 | 3 | Yes |
| UV light |  |  | 1 | 1 | 2 | Yes |

aPesticides include acetylcholinesterase inhibitors, β-Hexachlorohexane, hexachlorobenzene, dichlorodiphenyldichloroethylene (DDE), dichlorodiphenyltrichloroethane (DDT), diethyldithiophosphate (DEDTP), diethylphosphate (DEP), diethylthiophosphate (DETP), dimethyldithiophosphate (DMDTP), dimethylthiophosphate (DMTP), organochlorides, organophosphates, and tributyltin.

bPlastics include plastic baby bottles and plasticizers.

cPhtalates include di(2-ethylhexyl)phtalate (DHEP), monobenzyl phtalate (MBzP), monocyclohexyl phtalate (MCHP), mono(3-carboxypropyl)phtalate (MCPP), mono(2-ethylheyl)phtalate (MEHP), mono(2-ethyl-5-hydroxyhexyl)phtalate (MEHHP), mono-ethyl phtalate (MEP), monoisononyl phtalate (MiNP), mono-methyl phtalate (MMP), and mono-n-butyl phtalate (MnBP).

dDioxin-like substances include furans, polychlorinated biphenyls (PCBs), polybrominated diphenyl ethers (PBDE), and flame retardants.

ePerfluorinated molecules include perfluoroalkyl molecules, perfluorohexane sulfonate, perfluorooctane sulfonate, perfluorooctanoate, perfluorooctanoic acid, polyfluorinated molecules, and stain repellant.

fIndoor air pollution includes particulate matter (PM) and volatile organic compounds (VOC).

gOutdoor air pollution includes acetaldehyde, alpha-pinene, benzene, dichloromethane, dust, ethylbenzene, formaldehyde, hexanal, m,p-xylene, naphthalene, o-xylene, and toluene.

hBiomass fuels include agricultural residues such as straw and sticks, charcoal, dried animal dung, and wood.

iNitrogen molecules include nitrates, nitrogen dioxide, nitrogen oxide, and nitrous oxide.

jsulfur molecules include sulfur dioxide and sulfuric acid.

kchlorination by-products include haloacetic acids, and trihalomethanes.

Online supplement:

Fig. 17 – Checklist for evaluating consumer health information on the internet (Benedetti & Vargas, 2016)

Criteria for evaluating information from the web:

Ask yourself the following: Why did the person create the page? What's in it for them? Are they trying to sell me something?

## Accuracy

 Is the information based on sound medical research? Can the information on the web page be verified by another source?

 Are the sources cited reliable?

 Are there grammatical and spelling errors?

 Are there footnotes, bibliographies, or references so that you can verify the information? Are these reliable? (a citation to *Parade* magazine does not have the same weight as an article from *JAMA* )

/4

## Authority

 Who published the page? What are the person's credentials? What do you know about them?

 Is the person backed by a known organization? (The American Association for Cancer Therapy may be a made-up name for something operating out of someone's basement.)

 Is the person affiliated with a university? If so, is the person a student or a faculty member?

 Can you easily find contact information on the web page? Check the about us link, usually found at the beginning or the end of a webpage. What does the About Us section tell you about the purpose of the organization? Can you find a physical location for the organization? Or is the only way to contact the organization through a webform?

 What is the domain name? (.edu, .gov ) Is it a personal page or supported by the organization? The tilde (~) means that the site is a personal page (compare an address like med.harvard.edu/~jsmith/headache to med.harvard.edu/neurology/headache)

/5

## Bias/Objectivity

 Is the information showing just one point of view?

 What kind of institution sponsored the webpage? A pharmaceutical company? A non-profit organization?

 Is advertising clearly marked?

 Can you tell if the information you are reading is advertisement?

 Do the graphics, fonts, and verbiage play to the emotions? Beware of CAPITAL LETTERS, EXCLAMATION POINTS!!!!! Or words like MIRACLE CURE!!!

 Is the author using data improperly to promote a position or a product?

/6

**Currency/Timeliness**

 Is there a date on the page?

 When was the page last updated?

 Do the links work?

 Has there been more recent research on the subject? Many medical treatments change with the publication of new studies. What was published a year ago may be outdated now.

/4

## Coverage

 Is the information complete?

 Are there sources given for additional information?

/2

Total

/21

Online supplement:

Table 3 – Results of website evaluation

| Source | Accuracy | Authority | Bias & Objectivity | Currency & Timeliness | Coverage | Total  Score |
| --- | --- | --- | --- | --- | --- | --- |
| Exposures: Quarterly Newsletter | No spelling or grammar errors, footnotes & references to other online sources such as David Suzuki and government websites, no references to peer-reviewed scientific research  -score: 2/4 | Written by experts in the field who are known to be reliable, backed by the University of Alberta and Alberta Health Services, contact information easily found online  -score: 5/5 | Shows one point of view, backed by Alberta Health Services & the University of Alberta, no advertising, text does not play on emotions, data used appropriately  -score: 5/6 | Updated September 2010 to April 2011, links work, there has been more recent research  -score: 2/4 | Information complete enough, sources given for more  Information  -score: 2/2 | 16/21  (76%) |
| Health Canada | No spelling or grammar errors, assume it is based on sound research but no footnotes or references  -score: 2/4 | Likely written by experts in the field, but no authorship available on website, backed by the government of Canada, contact information easily found online, website ends with .gov  -score: 3/5 | Shows one point of view, backed by the government of Canada, no advertising, text does not play on emotions, data used appropriately  -score 5/6 | Updated April 2016, links work  -score: 4/4 | Information complete enough, sources given for more information  -score: 2/2 | 16/21  (76%) |
| World Health Organization  (WHO) | No spelling and grammar errors, information based on research, research often done by the WHO, reliable, no footnotes  -score 3/4 | Written by scientists, unsure if backed by university, backed by the WHO, contact information easily found online, website ends with .int  -score 4/5 | Shows one point of view, sponsored by the WHO, no advertising, text does not play on emotions, data used appropriately  -score 5/6 | Updated 2016, links work  -score 4/4 | Information complete enough, sources given for more  -score 2/2 | 18/21  (86%) |

Online supplement:

Table 4 – Literature review references: Grey literature/Media

(numbers correspond to references in main document)

| **Topic** | **Subtopic** | **Sub-subtopic** | **References** |
| --- | --- | --- | --- |
| **Aborginal issues** | | | 28, 49, 71, 127, 130, 169, 185, 204, 208, 234, 235 |
| Pollution on Ammjiwnaang reserve |  |  | 28, 71, 127, 130, 169, 185, 208 |
| Pollution on 1st Nations reserves NOS |  |  | 234 |
| Water pollution on 1st Nations reserves |  |  | 49, 185, 204 |
| Pollution effect on Inuit |  |  | 235 |
| **Cleaning products** | | | 18, 21, 205, 207 |
| Not otherwise specified (NOS) |  |  | 18, 205 |
| 2-butoxyethanol |  |  | 207 |
| Ethoxylated nonyl phenols |  |  | 207 |
| Triclosan |  |  | 21 |
| **Elements (Non-metal)** | | | 36, 64, 71, 185, 198, 235 |
| Arsenic |  |  | 36, 64, 71, 185, 198, 235 |
| Fluoride |  |  | 235 |
| **Food** | | | 21, 34, 49, 63, 64, 85, 88, 142, 185 |
| NOS |  |  | 21, 142 |
| Genetically modified organisms |  |  | 34, 63, 88, 185 |
| Mercury in fish |  |  | 49, 64, 85, 88, 185 |
| **Metals** | | | 18, 28, 36, 49, 52, 64, 66, 71, 81, 85, 88, 108, 124, 127, 130, 135, 146, 160, 169, 180, 185, 187, 189, 198, 205, 217, 219, 235 |
| NOS |  |  | 219 |
| Aluminum |  |  | 71, 180 |
| Cadmium |  |  | 71, 180 |
| Lead |  |  | 18, 36, 64, 66, 71, 81, 85, 135, 146, 160, 185, 187, 189, 198, 205, 217, 235 |
| Manganese |  |  | 235 |
| Mercury |  |  | 28, 36, 49, 52, 64, 71, 81, 85, 88, 124, 127, 130, 169, 185, 198, 205, 235 |
| Nickel |  |  | 180 |
| Uranium |  |  | 28, 108, 127 |
| **Personal hygiene/cosmetics** | | | 18, 21, 36, 44, 66, 81, 107, 123, 179 |
| NOS |  |  | 18, 36, 66, 123, 179 |
| Formaldehyde |  |  | 81, 107 |
| Parabens |  |  | 107 |
| Toluene |  |  | 107 |
| Triclosan |  |  | 21, 44 |
| **Topic** | **Subtopic** | **Sub-subtopic** | **References** |
| **Pesticides** | | | 5, 18, 21, 28, 36, 46, 52, 63, 64, 71, 81, 85, 124, 127, 130, 160, 197, 205, 218, 219, 235 |
| **Plastics** | | | 5, 14, 18, 21, 36, 44, 64, 72, 81, 107, 118, 119, 120, 121, 123, 124, 125, 126, 127, 129, 131, 141, 151, 152, 161, 162, 163, 180, 184, 200, 201, 202, 203, 210, 212, 214, 216, 219, 226 |
| Bisphenol A (BPA) |  |  | 5, 14, 18, 21, 36, 44, 72, 81, 118, 119, 120, 121, 124, 125, 126, 127, 131, 141, 151, 152, 161, 162, 163, 180, 184, 200, 201, 202, 203, 210, 212, 214, 216, 226 |
| Phtalates |  |  | 18, 36, 64, 81, 107, 123, 124, 127, 129, 163, 184, 219, 226 |
| **Pollution** | | | 18, 21, 28, 34, 36, 49, 52, 63, 64, 71, 79, 80, 81, 85, 88, 110, 124, 127, 128, 130, , 134, 142, 145, 147, 169, 185, 187, 188, 198, 199, 204, 205, 206, 208, 211, 213, 219, 235 |
| NOS |  |  | 213 |
| Air pollution |  |  | 18, 21, 28, 34, 36, 49, 52, 63, 64, 71, 80, 81, 85, 124, 127, 128, 130, 131, 134, 142, 145, 147, 169, 185, 187, 188, 198, 199, 205, 206, 208, 211, 219, 235 |
|  | NOS |  | 80 |
|  | Benzene |  | 28, 71, 198 |
|  | Cigarettes & Smoke |  | 81, 124, 187, 199, 235 |
|  | Dioxins, furans, PCB, PBDE, flame retardants |  | 18, 21, 28, 36, 49, 64, 81, 85, 124, 127, 130, 142, 169, 185, 198, 219, 235 |
|  | HEPA filters |  | 18, 134, 147 |
|  | Organochlorine & lindane |  | 142 |
|  | Perchlorate & perchloroethylene |  | 71, 235 |
|  | Perfluoro molecules |  | 21, 124, 128, 142 |
| Indoor air pollution |  |  | 18, 131, 147, 206, 211 |
|  | NOS |  | 131, 206 |
|  | Mould |  | 18, 81, 147 |
|  | Ozone (from ionizing air cleaners) |  | 211 |
| Outdoor air pollution, particulate matter & volatile organic compounds (VOC) |  |  | 18, 28, 34, 49, 52, 63, 64, 71, 85, 127, 130, 134, 142, 145, 147, 169, 185, 187, 188, 198, 199, 205, 208, 235 |
|  | NOS |  | 63, 64, 134, 142, 145, 147, 199 |
|  | Air pollution from oil production |  | 18, 28, 71, 127, 185 |
|  | Air pollution in Sarnia, On. & Ammjiwnaang reserve |  | 28, 71, 127, 130, 169, 185, 208 |
| **Topic** | **Subtopic** | **Sub-subtopic** | **References** |
|  | Ammonia & ammonium nitrate |  | 49 |
|  | Benzene |  | 28, 71, 198 |
|  | Carbon monoxide |  | 28, 49, 235 |
|  | Fuel |  | 34, 85, 187 |
|  |  | Coal | 34, 85, 187 |
|  |  | Gas, diesel, exhaust | 187 |
|  | Methanol |  | 49 |
|  | Nitrogen molecules |  | 28, 49, 205 |
|  | Phenanthrene |  | 49 |
|  | Phosphorous |  | 49 |
|  | Polycyclic aromatic hydrocarbons (PAH) |  | 134, 187, 188 |
|  | Sulfur molecules |  | 28, 49 |
|  | Toluene |  | 185 |
| Soil pollution |  |  | 28, 52, 64, 185 |
| Water pollution |  |  | 18, 21, 28, 49, 52, 63, 64, 71, 85, 88, 110, 142, 185, 204, 235 |
|  | NOS |  | 18, 21, 28, 52, 63, 71, 85, 119, 142, 204, 235 |
|  | Mercury in fish |  | 49, 64, 85, 88, 185 |
| Noise pollution |  |  | 79, 80 |
| **Technology** | | | 34 |
| Cell phones |  |  | 34 |
| Power lines / Electromagnetic fields |  |  | 34 |
| **Miscellaneous** | | | 28, 34, 53, 71, 112, 1, 165, 209, 215, 222, 230, 234, 235 |
| Asbestos |  |  | 28, 53, 71, 112, 122, 165, 209, 215, 222, 230, 234 |
|  | NOS |  | 28, 53, 165 |
|  | Asbestos in Quebec |  | 112, 122, 209, 215, 222, 230 |
|  | Asbestos in Sarnia |  | 71, 234 |
| Radiation |  |  | 34, 235 |
| UV light |  |  | 34 |

Online supplement:

Table 5 – Literature review references: Scientific literature

| **Topic** | **Subtopic** | **Sub-subtopic** | **References** |
| --- | --- | --- | --- |
| **Aborginal issues** | | | 26, 27, 25, 45, 51, 62, 84, 94, 113, 176, 181, 193, 220, 221 |
| Lead in Nunavik |  |  | 45 |
| Pollution in 1st Nations traditional diet |  |  | 84 |
| Water pollution on 1st Nations reserves |  |  | 113, 176, 181 |
| Pollution effect on Inuit |  |  | 26, 27, 25, 51, 62, 94, 193, 220, 221 |
| **Cleaning products** | | | 48 |
| NOS |  |  | 48 |
| **Elements (Non-metal)** | | | 13, 31, 40, 48, 67, 97, 115, 117, 157, 166, 221 |
| Arsenic |  |  | 13, 31, 115, 117, 157, 166 |
| Beryllium |  |  | 97 |
| Cobalt |  |  | 67 |
| Radon |  |  | 40, 48, 166 |
| Selenium |  |  | 67, 221 |
| **Food** | | | 10, 25, 26, 27, 29, 31, 32, 43, 48, 51, 62, 84, 133, 139, 164, 166, 178, 193, 220, 221, 232 |
| NOS |  |  | 43, 84 |
| 1,3-butadiene |  |  | 166 |
| Acrylamide |  |  | 139 |
| Alternia & alternariol |  |  | 164 |
| Ammeline & ammelide |  |  | 29 |
| Arsenic |  |  | 166 |
| Artificial colouring |  |  | 31 |
| Benzene |  |  | 166 |
| Benzo[a]pyrene |  |  | 166 |
| Benzoate |  |  | 31 |
| Chromium (hexavalent) |  |  | 166 |
| Cyanuric acid |  |  | 29 |
| Genetically modified organisms |  |  | 10, 48, 133 |
| Melamine |  |  | 29, 32 |
| Mercury in fish |  |  | 25, 26, 27, 51, 62, 178, 193, 220, 221, 232 |
| Polychlorinated biphenyls (PCB) in fish |  |  | 232 |
| **Metals** | | | 13, 16, 19, 24, 25, 26, 27, 30, 31, 35, 43, 45, 48, 50, 51, 55, 57, 58, 62, 67, 75, 77, 78, 87, 95, 98, 105, 115, 138, 154, 166, 178, 193, 195, 220, 221, 232, 233 |
| NOS |  |  | 30 |
| Aluminum |  |  | 50 |
| Cadmium |  |  | 19, 50, 67, 77, 78, 87, 95, 166, 233 |
| Copper |  |  | 87 |
| **Topic** | **Subtopic** | **Sub-subtopic** | **References** |
| Lead |  |  | 13, 16, 19, 25, 26, 27, 31, 35, 43, 45, 48, 50, 57, 58, 62, 67, 77, 78, 87, 95, 115, 154, 220, 221, 233 |
| Manganese |  |  | 24, 77, 115 |
| Mercury |  |  | 25, 26, 27, 51, 55, 62, 67, 75, 77, 78, 115, 138, 154, 178, 193, 220, 232, 233 |
| Nickel |  |  | 67, 87, 166 |
| Uranium |  |  | 98 |
| Zinc |  |  | 87 |
| **Personal hygiene/cosmetics** | | | 48, 224 |
| NOS |  |  | 48 |
| Halobenzoquinones |  |  | 224 |
| **Pesticides** | | | 3, 10, 31, 48, 51, 67, 77, 95, 115, 133, 137, 154, 155, 178, 182, 196 |
| **Plastics** | | | 11, 19, 31, 33, 35, 48, 59, 77, 115, 154, 159,173, 178, 223 |
| 2,6-di-isopropylnaphthalene (DIPN) |  |  | 173 |
| 2,4-di-tert-butyl phenol |  |  | 173 |
| Alkane |  |  | 173 |
| Benzene |  |  | 173 |
| Bisphenol A (BPA) |  |  | 19, 31, 33, 35, 48, 59, 77, 115, 154, 173, 178, 223 |
| Phtalates |  |  | 11, 19, 31, 33, 154, 159, 173, 178 |
| Polypropylene (PP) |  |  | 173 |
| Silicone |  |  | 173 |
| **Pollution** | | | 1, 2, 3, 4, 8, 9, 11, 12, 13, 15, 17, 19, 20, 23, 25, 26, 27, 30, 31, 37, 38, 39, 41, 47, 48, 51, 54, 56, 60, 61, 62, 65, 67, 68, 69, 73, 75, 76, 77, 83, 84, 86, 87, 89, 91, 92, 93, 94, 95, 96, 98, 99, 100, 101, 102, 104, 105, 106, 109, 111, 113, 114, 115, 132, 136, 140, 144, 148, 149, 150, 153, 154, 156, 157, 158, 166, 167, 168, 170, 171, 172, 174, 175, 176, 177, 178, 181, 182, 183, 186, 190, 191, 193, 194, 220, 221, 224, 225, 227, 228, 229, 231, 232, 238 |
| NOS |  |  | 84 |
| Air pollution |  |  | 1, 3, 4, 8, 9, 11, 12, 15, 17, 19, 20, 23, 25, 26, 30, 31, 37, 38, 39, 47, 48, 51, 54, 56, 61, 62, 65, 67, 68, 69, 73, 75, 76, 77, 83, 86, 87, 89, 91, 92, 94, 95, 96, 99, 100, 101, 102, 105, 106, 109, 111, 113, 114, 115, 132, 136, 140, 144, 149, 150, 153, 154, 156, 158, 166, 167, 168, 170, 171, 172, 174, 175, 177, 178, 183, 186, 190, 191, 194, 221, 225, 227, 228, 229, 231, 232, 238 |
| **Topic** | **Subtopic** | **Sub-subtopic** | **References** |
|  | NOS |  | 30, 75 |
|  | Benzene |  | 140, 150, 166 |
|  | Benzo[a]pyrene |  | 166 |
|  | Chromium (hexavalent) |  | 87, 166 |
|  | Cigarettes & Smoke |  | 11, 12, 15, 31, 39, 47, 48, 69, 77, 83, 94, 96, 100, 101, 102, 114, 136, 144, 154, 174, 178, 190, 191, 221, 231, 228, 238 |
|  | Dioxins, Polychlorinated biphenyls (PCBs), polybrominated diphenyl ethers (PBDE), flame retardants |  | 1, 3, 4, 9, 19, 25, 26, 31, 48, 51, 61, 62, 67, 68, 77, 95, 111, 115, 153, 154, 156, 171, 178, 221, 232 |
|  | HEPA filters |  | 96 |
|  | Perfluoro molecules |  | 20, 65, 73, 77, 170 |
| Indoor air pollution |  |  | 11, 17, 20, 48, 65, 73, 77, 100, 136, 158, 166, 171, 174, 178, 183, 228, 229 |
|  | NOS |  | 20, 65, 73, 77, 100, 136, 158, 166, 171, 178, 183, 228, 229 |
|  | Mould |  | 11, 17, 48, 174 |
| Outdoor air pollution/PM/VOCs |  |  | 8, 11, 12, 15, 23, 37, 38, 48, 54, 56, 67, 69, 76, 86, 89, 91, 92, 95, 99, 105, 106, 109, 113, 114, 132, 136, 140, 144, 149, 150, 154, 166, 167, 168, 172, 174, 175, 177, 178, 186, 194, 225, 227, 229 |
|  | NOS |  | 8, 11, 12, 15, 23, 37, 38, 48, 92, 113, 114, 132, 144, 154, 172, 175, 177, 178, 227 |
|  | 1,3-butadiene |  | 150, 166 |
|  | Air pollution from oil production |  | 54, 194 |
|  | Air pollution in Sarnia, On. & Ammjiwnaang reserve |  | 140 |
|  | Benzene |  | 140, 150, 166 |
|  | Carbon monoxide |  | 91, 99, 150, 167 |
|  | Chlordane & oxychlordane |  | 67, 95 |
|  | Formaldehyde |  | 150 |
|  | Fuel |  | 106, 136, 149, 166, 186 |
|  |  | Biomass fuels | 136, 149 |
|  |  | Coal | 106 |
|  |  | Gas, diesel, exhaust | 166, 186 |
|  | Nitrogen molecules |  | 56, 69, 89, 91, 99, 109, 140, 167, 168, 174, 186, 229 |
|  | O/m/p-xylene |  | 140 |
|  | Ozone |  | 69, 91, 109, 136, 167, 186, 229 |
|  | Polycyclic aromatic hydrocarbons (PAH) |  | 150, 154 |
|  | Sulfur molecules |  | 54, 76, 91, 99, 105, 136, 140, 167, 186 |
|  | Toluene |  | 140 |
| **Topic** | **Subtopic** | **Sub-subtopic** | **References** |
|  | Toxaphene |  | 95 |
|  | Trans-nonachlor |  | 67 |
|  | Tritium |  | 225 |
| Soil pollution |  |  | 13, 67, 75, 93, 113, 154 |
| Water pollution |  |  | 12, 25, 26, 27, 30, 41, 48, 51, 60, 62, 67, 98, 104, 113, 148, 154, 157, 166, 176, 178, 181, 182, 193, 220, 221, 224, 232 |
|  | NOS |  | 12, 30, 41, 48, 60, 67, 98, 113, 148, 154, 157, 176, 181 |
|  | 1,3-butadiene |  | 166 |
|  | Arsenic |  | 166 |
|  | Benzene |  | 166 |
|  | Benzo[a]pyrene |  | 166 |
|  | Chromium (hexavalent) |  | 166 |
|  | Halobenzoquinones |  | 224 |
|  | Chlorination by-products |  | 104 |
|  | Mercury in fish |  | 25, 26, 27, 51, 62, 178, 193, 220, 221, 232 |
|  | Polychlorinated biphenyls (PCB) in fish |  | 232 |
| Light pollution |  |  | 2 |
| Noise pollution |  |  | 2, 8, 113 |
| **Technology** |  |  | 178 |
| Nanoparticles |  |  | 178 |
| **Miscellaneous** | | | 19, 48, 74, 166, 178 |
| Asbestos NOS |  |  | 48, 74, 166 |
| Azo dyes |  |  | 19 |
| Radiation |  |  | 178 |
| UV light |  |  | 178 |

Complete references

- - - 1. Abdelouahab et al: Maternal and cord-blood thyroid hormone levels and exposure to polybrominated diphenyl ethers and polychlorinated biphenyls during early pregnancy. [*Am J Epidemiol.*](http://www.ncbi.nlm.nih.gov/pubmed/?term=Maternal+and+Cord-Blood+Thyroid+Hormone+Levels+and+Exposure+to+Polybrominated+Diphenyl+Ethers+and+Polychlorinated+Biphenyls+During+Early+Pregnancy) 2013:178(5): 701-713.
      2. Aita et al: Intervention minimizing preterm infants' exposure to NICU light and noise. [*Clin Nurs Res.*](http://www.ncbi.nlm.nih.gov/pubmed/?term=Intervention+Minimizing+Preterm+Infants'+Exposure+to+NICU+Light+and+Noise) 2013:22(3): 337-358.
      3. Aleksa et al. Detection of polybrominated biphenyl ethers (PBDEs) in pediatric hair as a tool for determining in utero exposure. [*Forensic Sci Int.*](http://www.ncbi.nlm.nih.gov/pubmed/?term=Detection+of+polybrominated+biphenyl+ethers+(PBDEs)+in+pediatric+hair+as+a+tool+for+determining+in+utero+exposure) 2012:218(1-3): 37-43.
      4. Aleksa, Liesivuori & Koren: Hair as a biomarker of polybrominated diethyl ethers’ exposure in infants, children and adults. [*Toxicol Lett.*](http://www.ncbi.nlm.nih.gov/pubmed/?term=Hair+as+a+biomarker+of+polybrominated+diethyl+ethers’+exposure+in+infants%2C+children+and+adult) 2012:210(2): 198-202.
      5. Alphonso. Blue-collar workplaces linked to higher risk of breast cancer. The Globe and Mail. (Toronto, On.) 2012 11 19.
      6. American Academy of Pediatrics Council on Environmental Health. Etzel, RA, editor. Pediatric Environmental Health. 3rd ed. Illinois: Elk Grove Village. 2012.
      7. American Academy of Pediatrics Council on Environmental Health. Etzel, RA, editor. Pediatric Environmental Health, 3rd ed, Illinois: Elk Grove Village. 2012. p. 27-28.
      8. Amram et al: Proximity of public elementary schools to major roads in Canadian urban areas. [*Int J Health Geogr.*](http://www.ncbi.nlm.nih.gov/pubmed/?term=Proximity+of+public+elementary+schools+to+major+roads+in+Canadian+urban+areas) 2011:10: 68.
      9. Arbuckle et al: Umbilical cord blood levels of perfluoroalkyl acids and polybrominated flame retardants. [*Int J Hyg Environ Health.*](http://www.ncbi.nlm.nih.gov/pubmed/?term=Umbilical+cord+blood+levels+of+perfluoroalkyl+acids+and+polybrominated+flame+retardants) 2013:216(2): 184-194.
      10. Aris & Leblanc: Maternal and fetal exposure to pesticides associated to genetically modified foods in Eastern Townships of Quebec, Canada. [*Reprod Toxicol.*](http://www.ncbi.nlm.nih.gov/pubmed/21338670)2011:31(4): 528-533.
      11. Arrandale et al: Exposure assessment in cohort studies of childhood asthma. [*Environ Health Perspect.*](http://www.ncbi.nlm.nih.gov/pubmed/21081299) 2011:119(5): 591-597.
      12. Aujunarain, Mack & Benchimol: The role of the environment in the development of pediatric inflammatory bowel disease. [*Curr Gastroenterol Rep.*](http://www.ncbi.nlm.nih.gov/pubmed/23640032) 2013:15(6): 326.
      13. Bacigalupo & Hale: Human health risks of Pb and As exposure via consumption of home garden vegetables and incidental soil and dust ingestion: A probabilistic screening tool. [*Sci Total Environ.*](http://www.ncbi.nlm.nih.gov/pubmed/?term=Human+health+risks+of+Pb+and+As+exposure+via+consumption+of+home+garden+vegetables+and+incidental+soil+and+dust+ingestion%3A+A+probabilistic+screening+tool) 2012:423: 27-38.
      14. Bains, Camille. Pregnant women exposed to chemical more likely to have aggressive girls: Study. [The Canadian Press](http://search.proquest.com.login.ezproxy.library.ualberta.ca/pubidlinkhandler/sng/pubtitle/The+Canadian+Press/$N/38907/DocView/360093888/fulltext/$B/1?accountid=14474). (Toronto, On.) 2009 10 06.
      15. Barakat-Haddad, Elliott & Pengelly: Health impacts of air pollution: A life course approach for examining predictors of respiratory health in adulthood. [*Ann Epidemiol.*](http://www.ncbi.nlm.nih.gov/pubmed/?term=Health+Impacts+of+Air+Pollution%3A+A+Life+Course+Approach+for+Examining+Predictors+of+Respiratory+Health+in+Adulthood)2012:22(4): 239-249.
      16. Barn & Kosatsky: Lead in school drinking water: Canada can and should address this important ongoing exposure source. [*Can J Public Health.*](http://www.ncbi.nlm.nih.gov/pubmed/?term=Lead+in+School+Drinking+Water%3A+Canada+Can+and+Should+Address+This+Important+Ongoing+Exposure+Source) 2011:102(2): 118-121.
      17. Barry et al: Factors contributing to risks for pediatric asthma in rural Saskatchewan. [*Ann Allergy Asthma Immunol.*](http://www.ncbi.nlm.nih.gov/pubmed/?term=Factors+contributing+to+risks+for+pediatric+asthma+in+rural+Saskatchewan)2012:109(4): 255-259.
      18. Barton. Calling on the professionals to detox the house. The Globe and Mail. (Toronto, On.) 2007 28 09.
      19. Becker, Edwards & Massey: Toxic chemicals in toys and children’s products: Limitations of current responses and recommendations for government and industry.[*Environ Sci Technol.*](http://www.ncbi.nlm.nih.gov/pubmed/?term=Toxic+Chemicals+in+Toys+and+Children’s+Products%3A+Limitations+of+Current+Responses+and+Recommendations+for+Government+and+Industry) 2010:44(21): 7986-7991.
      20. Beesoon et al: Exceptionally high serum concentrations of perfluorohexanesulfonate in a Canadian family are linked to home carpet treatment applications. [*Environ Sci Technol.*](http://www.ncbi.nlm.nih.gov/pubmed/?term=Exceptionally+High+Serum+Concentrations+of+Perfluorohexanesulfonate+in+a+Canadian+Family+are+Linked+to+Home+Carpet+Treatment+Applications)2012:46(23): 12960-12967.
      21. Belluz. Born to be fat: Does prenatal exposure to chemicals called 'obesogens' help explain the epidemic of obesity? [Maclean's](http://search.proquest.com.login.ezproxy.library.ualberta.ca/pubidlinkhandler/sng/pubtitle/Maclean$27s/$N/47976/DocView/762720870/fulltext/$B/1?accountid=14474)123(43):89.2010 11 08.
      22. Benedetti & Vargas. National Network of Libraries of Medicine [Internet]. Houston: [From snake oil to penicillin: Evaluating consumer health information on the internet](http://nnlm.gov/training/consumer/snakeoil/).[cited 2016 April 24]. Available from: <http://nnlm.gov/outreach/consumer/evalsite.html>
      23. Bernatsky et al: Associations between ambient fine particulate levels and disease activity in patients with systemic lupus erythematosus (SLE). [*Environ Health Perspect.*](http://www.ncbi.nlm.nih.gov/pubmed/?term=Associations+between+Ambient+Fine+Particulate+Levels+and+Disease+Activity+in+Patients+with+Systemic+Lupus+Erythematosus+(SLE)) 2011:119(1): 45-49.
      24. Bouchard et al: Intellectual impairment in school-age children exposed to manganese from drinking water. [*Environ Health Perspect.*](http://www.ncbi.nlm.nih.gov/pubmed/?term=Intellectual+Impairment+in+School-Age+Children+Exposed+to+Manganese+from+Drinking+Water)2011:119(1): 138-143.
      25. Boucher et al: Domain-specific effects of prenatal exposure to PCBs, mercury, and lead on infant cognition: Results from the environmental contaminants and child development study in Nunavik. [*Environ Health Perspect.*](http://www.ncbi.nlm.nih.gov/pubmed/?term=Domain-Specific+Effects+of+Prenatal+Exposure+to+PCBs%2C+Mercury%2C+and+Lead+on+Infant+Cognition%3A+Results+from+the+Environmental+Contaminants+and+Child+Development+Study+in+Nunavik)2014:122(3): 310-316.
      26. Boucher et al: Prenatal methylmercury, postnatal lead exposure, and evidence of attention deficit/hyperactivity disorder among Inuit children in arctic Québec. [*Environ Health Perspect.*](http://www.ncbi.nlm.nih.gov/pubmed/?term=Prenatal+Methylmercury%2C+Postnatal+Lead+Exposure%2C+and+Evidence+of+Attention+Deficit%2FHyperactivity+Disorder+among+Inuit+Children+in+Arctic+Québec)2012:120(10): 1456-1461.
      27. Boucher et al: Response inhibition and error monitoring during a visual go/no-go task in Inuit children Exposed to lead, polychlorinated biphenyls, and methylmercury. [*Environ Health Perspect.*](http://www.ncbi.nlm.nih.gov/pubmed/?term=boucher+et+al.+Response+Inhibition+and+Error+Monitoring+during+a+Visual+Go%2FNo-Go+Task+in+Inuit+Children+Exposed+to+Lead%2C+Polychlorinated+Biphenyls%2C+and+Methylmercury)2012:120(4): 608-615.
      28. Boyd. Environmental Hazards and Human Health. Canadian Dimension (Winnipeg, Ma.). 2012; 46(4):45.
      29. Braekevelt et al: Determination of melamine, ammeline, ammelide and cyanuric acid in infant formula purchased in Canada by liquid chromatography-tandem mass spectrometry. [*Food Addit Contam Part A Chem Anal Control Expo Risk Assess.*](http://www.ncbi.nlm.nih.gov/pubmed/?term=Determination+of+melamine%2C+ammeline%2C+ammelide+and+cyanuric+acid+in+infant+formula+purchased+in+Canada+by+liquid+chromatography-tandem+mass+spectrometry) 2011:28(6): 698-704.
      30. Buka & Walker: Paediatricians and the Environment. *Pediatr Child Health.* 2008:13(5): 395-396.
      31. Buka, Osornio-Vargas & Clark: Food additives, essential nutrients and neurodevelopmental behavioural disorders in children: A brief review. *Paediatrics & Child Health*. 2011:16(7): e54-e56.
      32. Buka, Orsonio-Vargas & Karr: Melamine Food Contamination: Relevance to Canadian Children. *Pediatrics & Child Health.* 2009:14(4): 222-224.
      33. Buka, Orsonio-Vargas & Walker: Canada declares bisphenol A (BPA) a “dangerous substance”: Questioning the safety of plastics. *Pediatrics & Child Health.* 2009:14(1): 11-13.
      34. Burdon & Moreau. The Suffering Gene: Environmental Threats to our Health. Environments (Waterloo, On.) 2005;33(1): 115.
      35. Bushnik et al: Lead and bisphenol A concentrations in the Canadian population. *Health Rep.* 2010:21(3): 7-18.
      36. Campbell. Environmental Issues. Pharmacy Practice. Rogers Media. (Toronto, On.) 2012 Feb/March;28(1): 31.
      37. Carlsten & Melen: Air pollution, genetics, and allergy: An update*.* [*Curr Opin Allergy Clin Immunol.*](http://www.ncbi.nlm.nih.gov/pubmed/22885891)2012:12(5): 455-60.
      38. Carlsten et al: Traffic-related air pollution and incident asthma in a high-risk birth cohort. *Occup Environ Med.* 2011:68(4): 291-295.
      39. Carlsten et al: Cotinine versus questionnaire: early-life environmental tobacco smoke exposure and incident asthma. *BMC Pediatr.* 2012:12: 187.
      40. Chen: Canadian lung cancer relative risk from radon exposure for short periods in childhood compared to a lifetime. [*Int J Environ Res Public Health.*](http://www.ncbi.nlm.nih.gov/pubmed/?term=Canadian+Lung+Cancer+Relative+Risk+from+Radon+Exposure+for+Short+Periods+in+Childhood+Compared+to+a+Lifetime)2013:10(5): 1916-26.
      41. Cheng et al: An ecological quantification of the relationships between water, sanitation and infant, child, and maternal mortality. [*Environ Health.*](http://www.ncbi.nlm.nih.gov/pubmed/?term=An+ecological+quantification+of+the+relationships+between+water%2C+sanitation+and+infant%2C+child%2C+and+maternal+mortality) 2012:11:4.
      42. Children’s Environmental Health Clinic (ChEHC) [Internet]. Edmonton. [cited 2016 August 29]. Available from: [http://www.chehc.ualberta.ca](http://www.chehc.ualberta.ca/)
      43. Clark et al: Is lead a concern in Canadian autistic children? *Pediatrics & Child Health.* 2010:15(1): 17-22.
      44. Cohen. More reasons to fear common chemicals in soaps and plastics: study. [Postmedia News](http://search.proquest.com.login.ezproxy.library.ualberta.ca/pubidlinkhandler/sng/pubtitle/Postmedia+News/$N/44251/DocView/849242906/fulltext/$B/1?accountid=14474) (Don Mills, On.) 2010 11 28.
      45. Couture et al: Lead exposure in Nunavik: from research to action. [*Int J Circumpolar Health.*](http://www.ncbi.nlm.nih.gov/pubmed/22818717) 2012:71.
      46. Craft. Weeding out the cosmetic use of pesticides…Naturally. Municipal World (Union, On.) 2005;115(10): 11.
      47. Crane et al: Effects of environmental tobacco smoke on perinatal outcomes: a retrospective cohort study. [*BJOG.*](http://www.ncbi.nlm.nih.gov/pubmed/?term=Effects+of+environmental+tobacco+smoke+on+perinatal+outcomes%3A+a+retrospective+cohort+study) 2011;118(7): 865-71.
      48. Crighton et al: Perceptions and experiences of environmental health risks among new mothers: a qualitative study in Ontario, Canada. [*Health Risk Soc.*](http://www.ncbi.nlm.nih.gov/pubmed/?term=Perceptions+and+experiences+of+environmental+health+risks+among+new+mothers%3A+a+qualitative+study+in+Ontario%2C+Canada) 2013;15(4): 295-312.
      49. Da Silva. Polluted Water Hits First Nations, but doesn't stop there. Canadian Dimension (Winninpeg, Ma.) 2006;40(5): 41.
      50. Dabeka et al: Lead, cadmium and aluminum in Canadian infant formulae, oral electrolytes and glucose solutions. [*Food Addit Contam Part A Chem Anal Control Expo Risk Assess.*](http://www.ncbi.nlm.nih.gov/pubmed/?term=Lead%2C+cadmium+and+aluminum+in+Canadian+infant+formulae%2C+oral+electrolytes+and+glucose+solutions) 2011;28(6): 744-753.
      51. Dallaire et al: Exposure to organochlorines and mercury through fish and marine mammal consumption: Associations with growth and duration of gestation among Inuit newborns. [*Environ Int.*](http://www.ncbi.nlm.nih.gov/pubmed/?term=Exposure+to+organochlorines+and+mercury+through+fish+and+marine+mammal+consumption%3A+Associations+with+growth+and+duration+of+gestation+among+Inuit+newborns)2013;54: 85-91.
      52. De Souza. Most Canadians concerned environment affecting health: poll. CanWest News (Don Mills, On.) 2007 08 21.
      53. De Souza. Ottawa not tracking removal of cancer-causing asbestos from federal buildings. Postmedia News (Don Mills, On.) 2012 05 21.
      54. Deger et al: Active and uncontrolled asthma among children exposed to air stack emissions of sulphur dioxide from petroleum refineries in Montreal, Quebec: A cross-sectional study. [*Can Respir J.*](http://www.ncbi.nlm.nih.gov/pubmed/?term=Active+and+uncontrolled+asthma+among+children+exposed+to+air+stack+emissions+of+sulphur+dioxide+from+petroleum+refineries+in+Montreal%2C+Quebec%3A+A+cross-sectional+study) 2012;19(2): 97-102.
      55. Delano & Koren: Emerging biomarkers of intrauterine neonatal and pediatric exposures to xenobiotics. [*Pediatr Clin North Am.*](http://www.ncbi.nlm.nih.gov/pubmed/?term=Emerging+Biomarkers+of+Intrauterine+Neonatal+and+Pediatric+Exposures+to+Xenobiotics)2012;59(5): 1059-1070.
      56. Dell et al: Presence of other allergic disease modifies the effect of early childhood traffic-related air pollution exposure on asthma prevalence. [*Environ Int.*](http://www.ncbi.nlm.nih.gov/pubmed/?term=Presence+of+other+allergic+disease+modifies+the+effect+of+early+childhood+traffic-related+air+pollution+exposure+on+asthma+prevalence)2014;65: 83-92.
      57. Deshommes & Prevost: Pb particles from tap water: Bioaccessibility and contribution to child exposure. [*Environ Sci Technol.*](http://www.ncbi.nlm.nih.gov/pubmed/?term=Pb+Particles+from+Tap+Water%3A+Bioaccessibility+and+Contribution+to+Child+Exposure) 2012;46(11): 6269-6277.
      58. Deshommes et al: Application of lead monitoring results to predict 0-7 year old children’s exposure at the tap. [*Water Res.*](http://www.ncbi.nlm.nih.gov/pubmed/?term=Application+of+lead+monitoring+results+to+predict+0e7+year+old+children’s+exposure+at+the+tap)2013;47(7): 2409-2420.
      59. Edge & Eyles: Message in a bottle: Claims disputes and the reconciliation of precaution and weight-of-evidence in the regulation of risks from Bisphenol A in Canada. *Health, Risk & Society.* 2013;15(5): 432-448.
      60. Edwards et al: Characteristics of small residential and commercial water systems that influence their likelihood of being on drinking water advisories in rural British Columbia, Canada: A cross-sectional study using administrative data. [*J Water Health.*](http://www.ncbi.nlm.nih.gov/pubmed/?term=Characteristics+of+smail+residentiai+and+commerciai+water+systems+that+infiuence+their+likelihood+of+being+on+drinking+water+advisories+in+rurai+British+Coiumbia%2C+Canada%3A+a+cross-sectional+study+using+administrative+data)2012;10(4): 629-649.
      61. El Majidi, Bouchard & Carrier: Systematic analysis of the relationship between standardized prenatal exposure to polychlorinated biphenyls and mental and motor development during follow-up of nine children cohorts. [*Regul Toxicol Pharmacol.*](http://www.ncbi.nlm.nih.gov/pubmed/?term=Systematic+analysis+of+the+relationship+between+standardized+prenatal+exposure+to+polychlorinated+biphenyls+and+mental+and+motor+development+during+follow-up+of+nine+children+cohorts)2013;66(1): 130-146.
      62. Ethier et al: Effects of environmental contaminant exposure on visual brain development: A prospective electrophysiological study in school-aged children. [*Neurotoxicology.*](http://www.ncbi.nlm.nih.gov/pubmed/?term=Effects+of+environmental+contaminant+exposure+on+visual+brain+development%3A+A+prospective+electrophysiological+study+in+school-aged+children)2012;33(5): 1075-1085.
      63. Ferrie. Taking back the planet and our health: Key to good health is detoxifying our food and environment. CCPA Monitor. 2008;14(7): 20.
      64. Fidelman. Chemical emissions by industry linked to numerous childhood diseases. Montreal Gazette (Montreal, Qc.) 2004 07 12.
      65. Fisher et al: Do perfluoroalkyl substances affect metabolic function and plasma lipids? Analysis of the 2007–2009 Canadian Health Measures Survey (CHMS) Cycle 1. [*Environ Res.*](http://www.ncbi.nlm.nih.gov/pubmed/?term=Do+perfluoroalkyl+substances+affect+metabolic+function+and+plasma+lipids%3F—Analysis+of+the+2007–2009%2C+Canadian+Health+Measures+Survey+(CHMS)+Cycle+1)2013;121: 95-103.
      66. Fitzpatrick. Conservatives won't name leaded lipsticks. [CanWest News](http://search.proquest.com.login.ezproxy.library.ualberta.ca/pubidlinkhandler/sng/pubtitle/CanWest+News/$N/44251/DocView/461203230/fulltext/$B/1?accountid=14474). (Don Mills, On.) 2008 06 16.
      67. Foster et al: Circulating metals and persistent organic pollutant concentrations in Canadian and non-Canadian born primiparous women from five Canadian centres: Results of a pilot biomonitoring study. [*Sci Total Environ.*](http://www.ncbi.nlm.nih.gov/pubmed/?term=Circulating+metals+and+persistent+organic+pollutant+concentrations+in+Canadian+and+non-Canadian+born+primiparous+women+from+five+Canadian+centres%3A+Results+of+a+pilot+biomonitoring+study) 2012;435-436: 326-336.
      68. Foster et al: Human maternal and umbilical cord blood concentrations of polybrominated diphenyl ethers. [*Chemosphere.*](http://www.ncbi.nlm.nih.gov/pubmed/21663933) 2011;84(10): 1301-1309.
      69. Fuertes et al: Childhood allergic rhinitis, traffic-related air pollution, and variability in the GSTP1, TNF, TLR2, and TLR4 genes: Results from the TAG Study. [*J Allergy Clin Immunol.*](http://www.ncbi.nlm.nih.gov/pubmed/?term=Childhood+allergic+rhinitis%2C+traffic-related+air+pollution%2C+and+variability+in+the+GSTP1%2C+TNF%2C+TLR2%2C+and+TLR4+genes%3A+Results+from+the+TAG+Study)2013;132(2): 342-352.
      70. Garbutt et al: What are parents worried about? Health problems and health concerns for children. *Clin pediatr.* 2012;51: 840.
      71. Giese. What it takes to fix a toxic town. [Chatelaine](http://search.proquest.com.login.ezproxy.library.ualberta.ca/pubidlinkhandler/sng/pubtitle/Chatelaine/$N/34716/DocView/214083006/fulltext/$B/1?accountid=14474) (Toronto, On.) 2008; 81(6): 237-248.
      72. Gill. Chemical Concerns. Global news [television broadcast]. Global television (Toronto, On.) 2009 05 24.
      73. Goosey & Harrard: Perfluoroalkyl compounds in dust from Asian, Australian, European, and North American homes and UK cars, classrooms, and offices. [*Environ Int.*](http://www.ncbi.nlm.nih.gov/pubmed/?term=Perfluoroalkyl+compounds+in+dust+from+Asian%2C+Australian%2C+European%2C+and+North+American+homes+and+UK+cars%2C+classrooms%2C+and+offices) 2011;37(1): 86-92.
      74. Guidotti: Asbestos in Canada: The End Is In Sight. *Arch Environ Occup Health.* 2012;67(1): 1-2.
      75. Guney et al: Children’s exposure to mercury-contaminated soils: Exposure assessment and risk Characterization. [*Arch Environ Contam Toxicol.*](http://www.ncbi.nlm.nih.gov/pubmed/?term=Children’s+Exposure+to+Mercury-Contaminated+Soils%3A+Exposure+Assessment+and+Risk+Characterization)2013;65(2): 345-55.
      76. Hackett et al: Intrinsic phenotypic differences of asthmatic epithelium and its inflammatory responses to respiratory syncytial virus and air pollution. *Am J Respir Cell Mol Biol.* 2011;45(5): 1090-100.
      77. Haines & Murray: Human biomonitoring of environmental chemicals - Early results of the 2007–2009 Canadian Health Measures Survey for males and females*.* [*Int J Hyg Environ Health.*](http://www.ncbi.nlm.nih.gov/pubmed/?term=Human+biomonitoring+of+environmental+chemicals—Early+results+of+the+2007–2009+Canadian+Health+Measures+Survey+for+males+and+females) 2012;215(2): 133-137.
      78. Haines et al: Reporting results of human biomonitoring of environmental chemicals to study participants: A comparison of approaches followed in two Canadian studies. [*J Epidemiol Community Health.*](http://www.ncbi.nlm.nih.gov/pubmed/?term=Reporting+results+of+human+biomonitoring+of+environmental+chemicals+to+study+participants%3A+a+comparison+of+approaches+followed+in+two+Canadian+studies) 2011;65(3): 191-198.
      79. Halter. Not part of autumn's song. The Globe and Mail (Toronto, On.) 2012 11 06.
      80. Hansen. Heart of hearing: Noisy workplaces boost risk of heart disease, says study. [Postmedia News](http://search.proquest.com.login.ezproxy.library.ualberta.ca/pubidlinkhandler/sng/pubtitle/Postmedia+News/$N/44251/DocView/848566587/fulltext/$B/1?accountid=14474) (Don Mills, On.) 2010 10 06.
      81. Hausmann. A Healthy Start in Life: Protecting Children From Hazardous Chemicals. Women & Environments International Magazine (Toronto, On.) Spring 2009; 80/81: 33.
      82. Health Canada. [Internet] Ottawa. [cited 2016 April 24]. Available from: <http://www.hc-sc.gc.ca/ewh-semt/air/index-eng.php>
      83. Hitchman et al: Support and correlates of support for banning smoking in cars with children: findings from the ITC Four Country Survey. [*Eur J Public Health.*](http://www.ncbi.nlm.nih.gov/pubmed/?term=Support+and+correlates+of+support+for+banning+smoking+in+cars+with+children%3A+findings+from+the+ITC+Four+Country+Survey) 2011;21(3): 360-365.
      84. Hlimi et al: Traditional food consumption behaviour and concern with environmental contaminants among Cree schoolchildren of the Mushkegowuk territory. [*Int J Circumpolar Health.*](http://www.ncbi.nlm.nih.gov/pubmed/?term=Traditional+food+consumption+behaviour+and+concern+with+environmental+contaminants+among+Cree+schoolchildren+of+the+Mushkegowuk+territory)2012;71: 17344.
      85. Hoffman. The "poisoned" breast. Today's Parent (Toronto, On.) 2005;22(5): 105-108.
      86. Huppe et al: Residential proximity to gasoline service stations and preterm birth. [*Environ Sci Pollut Res Int.*](http://www.ncbi.nlm.nih.gov/pubmed/?term=Residential+proximity+to+gasoline+service+stations+and+preterm+birth)2013;20(10): 7186-7193.
      87. Jennings & Petersen. Variability of North American regulatory guidance for heavy metal contamination of residential soil. *Journal of Environmental Engineering and Science*; 2006;5(6): 485-508.
      88. Jensen, Ruzickova & Smith. Mercury, Fish and Childbearing: What Every Woman Should Know to Protect Children and the Planet. Women & Environments International Magazine (Toronto, On.) 2008;76/77: 22.
      89. Johnson et al: Development of temporally refined land-use regression models predicting daily household-level air pollution in a panel study of lung function among asthmatic children. [*J Expo Sci Environ Epidemiol.*](http://www.ncbi.nlm.nih.gov/pubmed/?term=Development+of+temporally+refined+land-use+regression+models+predicting+daily+household-level+air+pollution+in+a+panel+study+of+lung+function+among+asthmatic+children)2013;23(3): 259-67.
      90. Kaplan et al: Non-Specific Abdominal Pain and Air Pollution: A Novel Association. [*PLoS One.*](http://www.ncbi.nlm.nih.gov/pubmed/?term=Non-Specific+Abdominal+Pain+and+Air+Pollution%3A+A+Novel+Association)2012;7(10): e47669.
      91. Kershaw et al: Identifying inequitable exposure to toxic air pollution in racialized and low-income neighbourhoods to support pollution prevention. [*Geospat Health.*](http://www.ncbi.nlm.nih.gov/pubmed/?term=Identifying+inequitable+exposure+to+toxic+air+pollution+in+racialized+and+low-income+neighbourhoods+to+support+pollution+prevention)2013;7(2): 265-78.
      92. Kindzierski & Ranganathan: Indoor and outdoor SO2 in a community near oil sand extraction and production facilities in Northern Alberta*. HKS Journal of Environmental Engineering and Science*. 2006;S5: S121-S129.
      93. Kovesi et al: Severe early lower respiratory tract infection is associated with subsequent respiratory morbidity in preschool Inuit children in Nunavut, Canada. [*J Asthma.*](http://www.ncbi.nlm.nih.gov/pubmed/?term=Severe+Early+Lower+Respiratory+Tract+Infection+is+Associated+with+Subsequent+Respiratory+Morbidity+in+Preschool+Inuit+Children+in+Nunavut%2C+Canada)2011;48(3): 241-247.
      94. Laird, Goncharov & Chan: Body burden of metals and persistent organic pollutants among Inuit in the Canadian Arctic. [*Environ Int.*](http://www.ncbi.nlm.nih.gov/pubmed/?term=Body+burden+of+metals+and+persistent+organic+pollutants+among+Inuit+in+the+Canadian+Arctic)2013;59: 33-40.
      95. Lanphear et al: Effects of HEPA air cleaners on unscheduled asthma visits and asthma symptoms for children exposed to secondhand tobacco smoke. [*Pediatrics.*](http://www.ncbi.nlm.nih.gov/pubmed/?term=Effects+of+HEPA+Air+Cleaners+on+Unscheduled+Asthma+Visits+and+Asthma+Symptoms+for+Children+Exposed+to+Secondhand+Tobacco+Smoke)2011;127(1): 93-101.
      96. Lariviere et al: Detection of beryllium in digested autopsy tissues by inductively coupled plasma mass spectrometry using a high matrix interface configuration. [*Anal Bioanal Chem.*](http://www.ncbi.nlm.nih.gov/pubmed/?term=Detection+of+beryllium+in+digested+autopsy+tissues+by+inductively+coupled+plasma+mass+spectrometry+using+a+high+matrix+interface+configuration) 2012;403(2): 409-418.
      97. Lariviere et al: Uranium bone content as an indicator of chronic environmental exposure from drinking water. [*J Environ Radioact.*](http://www.ncbi.nlm.nih.gov/pubmed/?term=Uranium+bone+content+as+an+indicator+of+chronic+environmental+exposure+from+drinking+water)2013;121: 98-103.
      98. Lavigne, Villeneuve & Cakmak: Air pollution and emergency department visits for asthma in Windsor, Canada. [*Can J Public Health.*](http://www.ncbi.nlm.nih.gov/pubmed/22338320) 2012;103(1): 4-8.
      99. Lawson et al: Endotoxin as a determinant of asthma and wheeze among rural dwelling children and adolescents: A case–control study. [*BMC Pulm Med.*](http://www.ncbi.nlm.nih.gov/pubmed/?term=Endotoxin+as+a+determinant+of+asthma+and+wheeze+among+rural+dwelling+children+and+adolescents%3A+A+case–control+study) 2012; 12:56.
      100. Lawson et al: Relationship of endotoxin and tobacco smoke exposure to wheeze and diurnal peak expiratory flow variability in children and adolescents. [*Respirology.*](http://www.ncbi.nlm.nih.gov/pubmed/?term=Relationship+of+endotoxin+and+tobacco+smoke+exposure+to+wheeze+and+diurnal+peak+expiratory+flow+variability+in+children+and+adolescents)2011;16(2): 332-339.
      101. Lawson et al: The association between endotoxin and lung function among children and adolescents living in a rural area. [*Can Respir J.*](http://www.ncbi.nlm.nih.gov/pubmed/?term=The+association+between+endotoxin+and+lung+function+among+children+and+adolescents+living+in+a+rural+area)2011;18(6): e89-94.
      102. Levac, Colquhoun & O’Brien: Scoping studies: Advancing the methodology. *Implement Sci.* 2010;5: 69.
      103. Levallois et al: Maternal exposure to drinking-water chlorination by-products and small-for-gestational-age neonates. [*Epidemiology.*](http://www.ncbi.nlm.nih.gov/pubmed/22317810) 2012;23(2): 267-76.
      104. Lewin et al: Short-term risk of hospitalization for asthma or bronchiolitis in children living near an aluminum smelter. [*J Expo Sci Environ Epidemiol.*](http://www.ncbi.nlm.nih.gov/pubmed/23695491) 2013;23(5): 474-480.
      105. Liberda & Chen: An evaluation of the toxicological aspects and potential doses from the inhalation of coal combustion products. [*J Air Waste Manag Assoc.*](http://www.ncbi.nlm.nih.gov/pubmed/?term=An+evaluation+of+the+toxicological+aspects+and+potential+doses+from+the+inhalation+of+coal+combustion+products) 2013;63(6): 671-80.
      106. Lubitow, A. Revealing the toxic truth: A case study of The Campaign for Safe Cosmetics. Women & Environments International Magazine (Toronto, On.) Fall 2008;76/77: 27.
      107. MacDowell. The Elliot Lake uranium miners’ battle to gain occupational health and safety improvements, 1950–1980. Labour (Edmonton, AB.) 2012;69: 91–118.
      108. MacIntyre et al: Traffic, asthma and genetics: combining international birth cohort data to examine genetics as a mediator of traffic-related air pollution’s impact on childhood asthma. [*Eur J Epidemiol.*](http://www.ncbi.nlm.nih.gov/pubmed/?term=Traffic%2C+asthma+and+genetics%3A+combining+international+birth+cohort+data+to+examine+genetics+as+a+mediator+of+traffic-related+air+pollution’s+impact+on+childhood+asthma)2013;28(7): 597-606.
      109. MacQueen. From sea to stinking sea. Maclean’s (Toronto, On.) 2005 10 17.
      110. Majidi et al: Relationship between prenatal exposure to polychlorinated biphenyls and birth weight: A systematic analysis of published epidemiological studies through a standardization of biomonitoring data. [*Regul Toxicol Pharmacol.*](http://www.ncbi.nlm.nih.gov/pubmed/?term=Relationship+between+prenatal+exposure+to+polychlorinated+biphenyls+and+birth+weight%3A+A+systematic+analysis+of+published+epidemiological+studies+through+a+standardization+of+biomonitoring+data)2012;64(1): 161-176.
      111. Mallinder. Deadly secret. Canada's History (Markham, On.) 2011; 91(2): 33.
      112. Martinello & Donelle: Online conversations among Ontario university students: Environmental concerns. [*Inform Health Soc Care.*](http://www.ncbi.nlm.nih.gov/pubmed/?term=Online+conversations+among+Ontario+university+students%3A+Environmental+concerns\)2012;37(3): 177-89.
      113. Meng et al: Spatial and environmental impacts on adverse birth outcomes in Ontario. *The Canadian Geographer.* 2013;57(2): 154–172.
      114. Mergler: Neurotoxic exposures and effects: Gender and sex matter! Hanninen Lecture 2011. [*Neurotoxicology.*](http://www.ncbi.nlm.nih.gov/pubmed/?term=Neurotoxic+exposures+and+effects%3A+Gender+and+sex+matter!+Ha+̈nninen+Lecture+2011)2012;33(4):644-51.
      115. Mikkonen & Raphael. York University School of Health Policy and Management. [Internet] Toronto: Social Determinants of Health: The Canadian Facts. c2010 [cited 2017 October 17]. Available from: http://www.thecanadianfacts.org/the_canadian_facts.pdf
      116. Minh, Lesbia & Celine: Urinary inorganic arsenic in residents living in close proximity to a nickel and copper smelter in Ontario, Canada. [*Can J Public Health.*](http://www.ncbi.nlm.nih.gov/pubmed/?term=Urinary+Inorganic+Arsenic+in+Residents+Living+in+Close+Proximity+to+a+Nickel+and+Copper+Smelter+in+Ontario%2C+Canada)2011;102(6): 467-471.
      117. Minsky, A. Canada's curbs on BPA premature, says WHO panel. [Postmedia News](http://search.proquest.com.login.ezproxy.library.ualberta.ca/pubidlinkhandler/sng/pubtitle/Postmedia+News/$N/44251/DocView/849240388/fulltext/$B/1?accountid=14474) (Don Mills, On.) 2010 11 10.
      118. Mittelstaedt. BPA may pose greater threat to newborns. [The Globe and Mail](http://search.proquest.com.login.ezproxy.library.ualberta.ca/pubidlinkhandler/sng/pubtitle/The+Globe+and+Mail/$N/46323/DocView/382668762/fulltext/$B/1?accountid=14474) (Toronto, On.) 2009 02 24.
      119. Mittelstaedt. Canadian stores race to purge bisphenol A products. The Globe and Mail (Toronto, On.) 2008 04 16.
      120. Mittelstaedt. Chemical used in water bottles linked to prostate cancer. The Globe and Mail (Toronto, On.) 2006 06 09.
      121. Mittelstaedt. Dangerous levels of asbestos in homes in Quebec mining area. The Globe and Mail. (Toronto, On.) 2007 11 07.
      122. Mittelstaedt. Environmental health effects of phtalates: Lotions, powders may pose risks to infants. The Globe and Mail. (Toronto, On.) 2008 02 04.
      123. Mittelstaedt. Eureka! Less really is more – deadly. [The Globe and Mail](http://search.proquest.com.login.ezproxy.library.ualberta.ca/pubidlinkhandler/sng/pubtitle/The+Globe+and+Mail/$N/46323/DocView/382576586/fulltext/$B/1?accountid=14474). (Toronto, On.) 2010 03 13.
      124. Mittelstaedt. Food may not be sole BPA source. [The Globe and Mail](http://search.proquest.com.login.ezproxy.library.ualberta.ca/pubidlinkhandler/sng/pubtitle/The+Globe+and+Mail/$N/46323/DocView/382664967/fulltext/$B/1?accountid=14474). (Toronto, On.) 2009 01 30.
      125. Mittelstaedt. Health Canada adds bisphenol A to list of toxic substances. [The Globe and Mail](http://search.proquest.com.login.ezproxy.library.ualberta.ca/pubidlinkhandler/sng/pubtitle/The+Globe+and+Mail/$N/46323/DocView/382713464/fulltext/$B/1?accountid=14474). (Toronto, On.) 2008 11 18.
      126. Mittelstaedt. Humanity at risk: Are the males going first? [The Globe and Mail](http://search.proquest.com.login.ezproxy.library.ualberta.ca/pubidlinkhandler/sng/pubtitle/The+Globe+and+Mail/$N/46323/DocView/382755110/fulltext/$B/1?accountid=14474). (Toronto, On.) 2008 09 20.
      127. Mittelstaedt. Non-stick chemical linked to thyroid illness. [The Globe and Mail](http://search.proquest.com.login.ezproxy.library.ualberta.ca/pubidlinkhandler/sng/pubtitle/The+Globe+and+Mail/$N/46323/DocView/382586303/fulltext/$B/1?accountid=14474). (Toronto, On.) 2010 01 22.
      128. Mittelstaedt. Phthalates hard to avoid. [The Globe and Mail](http://search.proquest.com.login.ezproxy.library.ualberta.ca/pubidlinkhandler/sng/pubtitle/The+Globe+and+Mail/$N/46323/DocView/382629405/fulltext/$B/1?accountid=14474). (Toronto, On.) 2009 06 23.
      129. Mittelstaedt. The mystery of the missing boys. The Globe and Mail. (Toronto, On.) 2007 04 11.
      130. Mittelstaedt. Unsafe levels of chemical leaching into drinks, U.S. panel says. The Globe and Mail. (Toronto, On.) 2007 08 01.
      131. Morin et al: Association study of genes associated to asthma in a specific environment in an asthma familial collection located in a rural area influenced by different industries. [I*nt J Environ Res Public Health.*](http://www.ncbi.nlm.nih.gov/pubmed/?term=Association+Study+of+Genes+Associated+to+Asthma+in+a+Specific+Environment%2C+in+an+Asthma+Familial+Collection+Located+in+a+Rural+Area+Influenced+by+Different+Industries) 2012;9(8): 2620-2635.
      132. Mueller & Gorst: Comment on “Maternal and fetal exposure to pesticides associated to genetically modified foods in Eastern Townships of Quebec, Canada" by A. Aris and S. Leblanc [Reprod. Toxicol. 31 (2011) 528-533]. [*Reprod Toxicol.*](http://www.ncbi.nlm.nih.gov/pubmed/22382376)2012;33(3): 401-402.
      133. Munro. Air pollution linked to genetic mutations. CanWest News. (Vancouver, BC.) 2004 05 13.
      134. Neergaard. Renovating your house? Lead dust may still be a hazard, U.S. experts warn. The Globe and Mail (Toronto, On.) 2012 01 09.
      135. Narang & Bush: Early origins of chronic obstructive pulmonary disease. [*Semin Fetal Neonatal Med.*](http://www.ncbi.nlm.nih.gov/pubmed/22265926) 2012;17(2): 112-118.
      136. Navaranjan et al: Exposures to multiple pesticides and the risk of Hodgkin lymphoma in Canadian men. [*Cancer Causes Control.*](http://www.ncbi.nlm.nih.gov/pubmed/23756639) 2013;24(9): 1661-1673.
      137. Nicolae, Ames & Quinonez: Dental amalgam and urinary mercury concentrations: a descriptive study. [*BMC Oral Health.*](http://www.ncbi.nlm.nih.gov/pubmed/?term=Dental+amalgam+and+urinary+mercury+concentrations%3A+a+descriptive+study)2013;13: 44.
      138. Normandin et al: Dietary exposure to acrylamide in adolescents from a Canadian urban center. [*Food Chem Toxicol.*](http://www.ncbi.nlm.nih.gov/pubmed/?term=Dietary+exposure+to+acrylamide+in+adolescents+from+a+Canadian+urban+center)2013;57: 75-83.
      139. Oiamo & Luginaah: Extricating sex and gender in air pollution research: A community-based study on cardinal symptoms of exposure. [*Int J Environ Res Public Health.*](http://www.ncbi.nlm.nih.gov/pubmed/?term=Extricating+Sex+and+Gender+in+Air+Pollution+Research%3A+A+Community-Based+Study+on+Cardinal+Symptoms+of+Exposure) 2013;10(9): 3801-17.
      140. Page. Bisphenol A, a chemical known to act like a female sex hormone, is in all of us. CanWest News (Don Mills, On.) 2007 04 24.
      141. Patton & Speranskaya. Keeping babies safe: Why we need global breast milk monitoring. Women & Environments International Magazine (Toronto, On.) 2008;76/77: 33.
      142. Paulson et al: Development of the Pediatric Environmental Health Specialty Unit Network in North America. *American Journal of Public Health.* 2009;99(S3): S511-516.
      143. Pawson et al: Myths, facts and conditional truths: What is the evidence on the risks associated with smoking in cars carrying children? *CMAJ.* 2011;183(10): E680-684.
      144. Peritz. Air pollution may increase risk of breast cancer, study finds. [The Globe and Mail](http://search.proquest.com.login.ezproxy.library.ualberta.ca/pubidlinkhandler/sng/pubtitle/The+Globe+and+Mail/$N/46323/DocView/756784015/fulltext/$B/1?accountid=14474) (Toronto, On.) 2010 10 07.
      145. Picard. Decades later, lead is stalking our kids: Second Opinion. Globe and Mail (Toronto, On.) 2005 04 14.
      146. Picard. Home reno may reduce asthma suffering. The Globe and Mail. (Toronto, On.) 2008 01 15.
      147. Pink: Child rights, right to water and sanitation, and human security. *Health Hum Rights.* 2012;14(1): E78-87.
      148. Po, FitzGerald & Carlsten: Biomass fuel exposure in rural women and children: Systematic review and meta-analysis. [*Thorax.*](http://www.ncbi.nlm.nih.gov/pubmed/?term=Respiratory+disease+associated+with+solid+biomass+fuel+exposure+in+rural+women+and+children%3A+systematic+review+and+meta-analysis)2011;66(3): 232-239.
      149. Price et al: Risk of childhood asthma prevalence attributable to residential proximity to major roads in Montreal, Canada. [*Can J Public Health.*](http://www.ncbi.nlm.nih.gov/pubmed/?term=Risk+of+Childhood+Asthma+Prevalence+Attributable+to+Residential+Proximity+to+Major+Roads+in+Montreal%2C+Canada)2012;103(2): 113-118.
      150. Puxley. Ban potentially toxic plastic baby bottles, rubber duckies: environmentalists. [The Canadian Press](http://search.proquest.com.login.ezproxy.library.ualberta.ca/pubidlinkhandler/sng/pubtitle/The+Canadian+Press/$N/38907/DocView/359981037/fulltext/$B/1?accountid=14474) (Toronto, On.) 2007 11 19.
      151. Puxley. Ontario considers ban on baby-bottle chemical linked to cancer. [The Canadian Press](http://search.proquest.com.login.ezproxy.library.ualberta.ca/pubidlinkhandler/sng/pubtitle/The+Canadian+Press/$N/38907/DocView/359975712/fulltext/$B/1?accountid=14474) (Toronto, On.) 2007 11 20.
      152. Quinn & Wania: Understanding differences in the body burden–age relationships of bioaccumulating contaminants based on population cross sections versus individuals. [*Environ Health Perspect.*](http://www.ncbi.nlm.nih.gov/pubmed/?term=Understanding+Differences+in+the+Body+Burden–Age+Relationships+of+Bioaccumulating+Contaminants+Based+on+Population+Cross+Sections+versus+Individuals)2012;120(4): 554-559.
      153. Rauch & Lanphear: Prevention of disability in children: Elevating the role of environment. [*Future Child.*](http://www.ncbi.nlm.nih.gov/pubmed/?term=Prevention+of+Disability+in+Children%3A+Elevating+the+Role+of+Environment)2012;22(1): 193-217.
      154. Rauch et al: Associations of prenatal exposure to organophosphate pesticide metabolites with gestational age and birth weight. [*Environ Health Perspect.*](http://www.ncbi.nlm.nih.gov/pubmed/22476135) 2012;120(7): 1055-1060.
      155. Rawn et al: PCDD/F and PCB concentrations in sera from the Canadian Health Measures Survey (CHMS) from 2007 to 2009. [*Environ Int.*](http://www.ncbi.nlm.nih.gov/pubmed/?term=PCDD%2FF+and+PCB+concentrations+in+sera+from+the+Canadian+Health+Measures+Survey+(CHMS)+from+2007+to+2009)2012 Oct;47: 48-55.
      156. Renaud et al: Evaluation of the effectiveness of arsenic screening promotion in private wells: a quasi-experimental study. [*Health Promot Int.*](http://www.ncbi.nlm.nih.gov/pubmed/?term=Evaluation+of+the+effectiveness+of+arsenic+screening+promotion+in+private+wells%3A+a+quasi-experimental+study) 2011;26(4): 465-75.
      157. Rennie et al: Domestic endotoxin exposure and asthma in children: epidemiological studies. [*Front Biosci (Elite Ed).*](http://www.ncbi.nlm.nih.gov/pubmed/22201855) 2012;4: 56-73.
      158. Saravanabhavan et al: Biomonitoring of phthalate metabolites in the Canadian population through the Canadian Health Measures Survey (2007–2009). [*Int J Hyg Environ Health.*](http://www.ncbi.nlm.nih.gov/pubmed/?term=Biomonitoring+of+phthalate+metabolites+in+the+Canadian+population+through+the+Canadian+Health+Measures+Survey+(2007–2009)) 2013;216(6): 652-61.
      159. Saxe. Lead, Children and Crime: Should municipalities act? Municipal World (Union, On.) 2008;118(3): 53.
      160. Schmidt. ‘BPA-free' baby bottle contains toxic chemical: Health Canada. [CanWest News](http://search.proquest.com.login.ezproxy.library.ualberta.ca/pubidlinkhandler/sng/pubtitle/CanWest+News/$N/44251/DocView/460007418/fulltext/$B/1?accountid=14474) (Don Mills, On.) 2009 09 07.
      161. Schmidt. Canada leads way with ban on baby bottles containing bisphenol A. [CanWest News](http://search.proquest.com.login.ezproxy.library.ualberta.ca/pubidlinkhandler/sng/pubtitle/CanWest+News/$N/44251/DocView/461217658/fulltext/$B/1?accountid=14474) (Don Mills, On.) 2008 04 19.
      162. Scott. Beyond BPA we need to get tough on toxics. Women & Environments International Magazine (Toronto, On.) 2011/2012; 88/89: 43.
      163. Scott et al: Alternaria toxins, alternariol and alternariol monomethyl ether in grain foods in Canada. [*Mycotoxin Res.*](http://www.ncbi.nlm.nih.gov/pubmed/?term=Alternaria+toxins+alternariol+and+alternariol+monomethyl+ether+in+grain+foods+in+Canada)2012;28(4): 261-6.
      164. Sentes. Oh, Canada, we stand on guard for asbestos. Canadian Foreign Policy (Waterloo, On.) 2009;15(3): 30.
      165. Setton et al: Risk-based indicators of Canadians’ exposures to environmental carcinogens. [*Environ Health.*](http://www.ncbi.nlm.nih.gov/pubmed/?term=Risk-based+indicators+of+Canadians’+exposures+to+environmental+carcinogens)2013;12: 15.
      166. Shah & Balkhair: Air pollution and birth outcomes: A systematic review. [*Environ Int.*](http://www.ncbi.nlm.nih.gov/pubmed/21112090) 2011;37(2): 498-516.
      167. Shin et al: Tracking national and regional spatial-temporal mortality risk associated with NO2 concentrations in Canada: A Bayesian hierarchical two-level model. [*Risk Anal.*](http://www.ncbi.nlm.nih.gov/pubmed/?term=Tracking+National+and+Regional+Spatial-Temporal+Mortality+Risk+Associated+with+NO2+Concentrations+in+Canada%3A+A+Bayesian+Hierarchical+Two-Level+Model)2012;32(3): 513-530.
      168. Shingler. Study says First Nation being exposed to pollutants in Ontario's 'chemical valley'. The Canadian Press (Toronto, On.) 2013 11 24.
      169. Shoeib et al: Indoor sources of poly- and perfluorinated compounds (PFCS) in Vancouver, Canada: Implications for human exposure. [*Environ Sci Technol.*](http://www.ncbi.nlm.nih.gov/pubmed/?term=Indoor+Sources+of+Poly-+and+Perfluorinated+Compounds+(PFCS)+in+Vancouver%2C+Canada%3A+Implications+for+Human+Exposure) 2011;45(19): 7999-8005.
      170. Shoeib et al: Legacy and current-use flmae retardants in house dust from Vancouver, Canada. [*Environ Pollut.*](http://www.ncbi.nlm.nih.gov/pubmed/?term=Legacy+and+current-use+flame+retardants+in+house+dust+from+Vancouver%2C+Canada)2012;169: 175-182.
      171. Siddique et al: Attention-deficit hyperactivity disorder in children chronically exposed to high level of vehicular pollution. [*Eur J Pediatr.*](http://www.ncbi.nlm.nih.gov/pubmed/?term=Attention-deficit+hyperactivity+disorder+in+children+chronically+exposed+to+high+level+of+vehicular+pollution)2011;170(7): 923-929.
      172. Simoneau, Van den Eede & Valzacchi: Identification and quantification of the migration of chemicals from plastic baby bottles used as substitutes for polycarbonate. [*Food Addit Contam Part A Chem Anal Control Expo Risk Assess.*](http://www.ncbi.nlm.nih.gov/pubmed/?term=Identification+and+quantification+of+the+migration+of+chemicals+from+plastic+baby+bottles+used+as+substitutes+for+polycarbonate) 2012;29(3): 469-80.
      173. Simons, To & Dell: The population attributable fraction of asthma among Canadian children. [*Can J Public Health.*](http://www.ncbi.nlm.nih.gov/pubmed/21485964)2011;102(1): 35-41.
      174. Sivagangabalan et al: The effect of air pollution on spatial dispersion of myocardial replarization in healthy human volunteers. [*J Am Coll Cardiol*.](http://www.ncbi.nlm.nih.gov/pubmed/?term=The+Effect+of+Air+Pollution+on+Spatial+Dispersion+of+Myocardial+Repolarization+in+Healthy+Human+Volunteers) 2011;57(2): 198-206.
      175. Smith et al: Public health evaluation of drinking water systems for First Nations reserves in Alberta, Canada. *Journal of Environmental Engineering and Science*. 2006;5: S1.
      176. Somers: Ambient air pollution exposure and damage to male gametes: Human studies and in situ 'sentinel' animal experiments. [*Syst Biol Reprod Med.*](http://www.ncbi.nlm.nih.gov/pubmed/?term=Ambient+air+pollution+exposure+and+damage+to+male+gametes%3A+human+studies+and+in+situ+'sentinel'+animal+experiments)2011;57(1-2): 63-71.
      177. Spady et al: Governance instruments that project children’s environmental health: Is enough being done? *Environmental Law Review.* 2008;10: 200-217.
      178. Spears. Scientists now claim hair dye causes cancer. Ottawa Citizen (Ottawa, On.) 2004 02 16.
      179. Spears. Scientists split on common baby-bottle plastic. [CanWest News](http://search.proquest.com.login.ezproxy.library.ualberta.ca/pubidlinkhandler/sng/pubtitle/CanWest+News/$N/44251/DocView/460113006/fulltext/$B/1?accountid=14474) (Don Mills, On.) 2008 02 09.
      180. Spence & Walters: “Is it safe?” Risk perception and drinking water in a vulnerable population. *The International Indigenous Policy Journal.* 2012;3(3): 9.
      181. St-Hilaire et al: An ecological study on childhood autism. *International Journal of Health Geographics.* 2012;11: 44.
      182. St-Jean et al. Indoor air quality in Montreal area day-care centres, Canada. [*Environ Res.*](http://www.ncbi.nlm.nih.gov/pubmed/?term=Indoor+air+quality+in+Montre+́al+area+day-care+centres%2C+Canada)2012;118: 1-7.
      183. Tanner. Phthalate chemical in IV feeding tubes linked to preemie liver problems, German study suggests. [The Canadian Press](http://search.proquest.com.login.ezproxy.library.ualberta.ca/pubidlinkhandler/sng/pubtitle/The+Canadian+Press/$N/38907/DocView/360039247/fulltext/$B/1?accountid=14474) (Toronto, On.) 2009 07 27.
      184. Tarachansky. In their backyard. Canadian Dimension (Winnipeg, Ma.) 2008;42(6): 34.
      185. Tashakkor, Chow & Carlsten: Modification by antioxidant supplementation of changes in human lung function associated with air pollutant exposure: A systematic review. [*BMC Public Health.*](http://www.ncbi.nlm.nih.gov/pubmed/?term=Modification+by+antioxidant+supplementation+of+changes+in+human+lung+function+associated+with+air+pollutant+exposure%3A+A+systematic+review)2011;11: 532.
      186. Taylor. Mom's pollution exposure may lower baby's IQ. [The Globe and Mail](http://search.proquest.com.login.ezproxy.library.ualberta.ca/pubidlinkhandler/sng/pubtitle/The+Globe+and+Mail/$N/46323/DocView/382617717/fulltext/$B/1?accountid=14474) (Toronto, On.) 2009 07 24.
      187. Taylor. Traffic pollution linked to premature births. The Globe and Mail. (Toronto, On.) 2011 10 14.
      188. Teotonio, Isabel. Pieces of poison. Ottawa Citizen (Ottawa, On.) 2004 09 07.
      189. Thakur et al: Comprehensive phenotype/genotype analyses of the norepinephrine transporter gene (SLC6A2) in ADHD: Relation to maternal smoking during pregnancy. [*PLoS One.*](http://www.ncbi.nlm.nih.gov/pubmed/?term=Comprehensive+Phenotype%2FGenotype+Analyses+of+the+Norepinephrine+Transporter+Gene+(SLC6A2)+in+ADHD%3A+Relation+to+Maternal+Smoking+during+Pregnancy) 2012;7(11): e49616.
      190. Thomas. Recent trends in upper respiratory infections, ear infections and asthma among young Canadian children. [*Health Rep.*](http://www.ncbi.nlm.nih.gov/pubmed/?term=Recent+trends+in+upper+respiratory+infections%2C+ear+infections+and+asthma+among+young+Canadian+children)2010;21(4): 47-52.
      191. Thompson & Thompson, editors. Genetics in Medicine, 7th Edition, Philadephia: Elselvier; 2007. p 77.
      192. Tian et al: Mercury hair concentrations and dietary exposure among Inuit preschool children in Nunavut, Canada. *Environment International.* 2011;37: 42–48.
      193. Timoney: Environmental and health impacts of Canada’s bitumen Industry: In search of answers. [*Environ Sci Technol.*](http://www.ncbi.nlm.nih.gov/pubmed/?term=Environmental+and+Health+Impacts+of+Canada’s+Bitumen+Industry%3A+In+Search+of+Answers)2012;46(5): 2496-2497.
      194. Tomljenovic & Shaw: Aluminum vaccine adjuvants: Are they safe? *Current Medicinal Chemistry.* 2011;18: 2630-2637.
      195. Turner, Wigle & Krewski: Residential pesticides and childhood leukemia: A systematic review and meta-analysis. [*Environ Health Perspect.*](http://www.ncbi.nlm.nih.gov/pubmed/20056585)2010;118(1): 33-41.
      196. Ubelacker. Certain pesticides linked to attention problems in young kids: study. [The Canadian Press](http://search.proquest.com.login.ezproxy.library.ualberta.ca/pubidlinkhandler/sng/pubtitle/The+Canadian+Press/$N/38907/DocView/744663046/fulltext/$B/1?accountid=14474) (Toronto, On.) 2010 08 19.
      197. Ubelacker. Chemicals may be damaging kids' brains. The Globe and Mail (Toronto, On.) 2006 11 08.
      198. Ubelacker. Traffic pollution a health risk for one-third of Canadians, doctors say. The Canadian Press (Toronto, On.) 2013 10 22.
      199. Unknown author. ACC Statement Regarding the FDA Science Board Subcommittee Report on Bisphenol A. Canada NewsWire (Ottawa, On.) 2008 10 29.
      200. Unknown author. Babies, parents, and daycares rally against toxic baby bottles. [Canada NewsWire](http://search.proquest.com.login.ezproxy.library.ualberta.ca/pubidlinkhandler/sng/pubtitle/Canada+NewsWire/$N/11327/DocView/455419824/fulltext/$B/1?accountid=14474) (Ottawa, On.) 2007 11 20.
      201. Unknown author. Bisphenol A can build up in babies and infants, researchers warn. [The Canadian Press](http://search.proquest.com.login.ezproxy.library.ualberta.ca/pubidlinkhandler/sng/pubtitle/The+Canadian+Press/$N/38907/DocView/360059986/fulltext/$B/1?accountid=14474) (Toronto, On.) 2009 02 20.
      202. Unknown author. Canada's announcement regarding BPA is contrary to the weight of worldwide scientific evidence. [Canada NewsWire](http://search.proquest.com.login.ezproxy.library.ualberta.ca/pubidlinkhandler/sng/pubtitle/Canada+NewsWire/$N/11327/DocView/757801565/fulltext/$B/1?accountid=14474) (Ottawa, On.) 2010 10 13.
      203. Unknown author. Canada's new government marks World Water Day, reports on progress to improve water quality on reserve, launches water kit for First Nations children. [Canada NewsWire](http://search.proquest.com.login.ezproxy.library.ualberta.ca/pubidlinkhandler/sng/pubtitle/Canada+NewsWire/$N/11327/DocView/455148738/fulltext/$B/1?accountid=14474) (Ottawa, On.) 2007 03 22.
      204. Unknown author. Children are more prone to environmental health hazards. The Times (Moncton, NB.) 2005 06 04.
      205. Unknown author. Construction dust caused illnesses at Brooklyn, N.S., school, report finds. [The Canadian Press](http://search.proquest.com.login.ezproxy.library.ualberta.ca/pubidlinkhandler/sng/pubtitle/The+Canadian+Press/$N/38907/DocView/360074725/fulltext/$B/1?accountid=14474) (Toronto, On.) 2009 08 26.
      206. Unknown author. Dear sister safetey: Health & safety questions and answers: I'm a janitor at a high school and I'm worried that some of the cleaning products I use are bad for my health. Our Times (Toronto, On.) 2004;23(5).
      207. Unknown author. Few male babies born in Chemical Valley community. Canadian Press (Toronto, On.) 2005 09 01.
      208. Unknown author. Letter to Quebec premier calls for halt on asbestos exports. [CanWest News](http://search.proquest.com.login.ezproxy.library.ualberta.ca/pubidlinkhandler/sng/pubtitle/CanWest+News/$N/44251/DocView/459074698/fulltext/$B/1?accountid=14474) (Don Mills, On.) 2010 04 09.
      209. Unknown author. Mountain Equipment Co-op Congratulated for Ceasing Sale of Products with Controversial Chemical. [Canada NewsWire](http://search.proquest.com.login.ezproxy.library.ualberta.ca/pubidlinkhandler/sng/pubtitle/Canada+NewsWire/$N/11327/DocView/455390713/fulltext/$B/1?accountid=14474) (Ottawa, On.) 2007 12 07.
      210. Unknown author. New concerns about ionizing air cleaners. Consumer Reports. 2005;70(5): 22.
      211. Unknown author. New Health Canada data on bisphenol A strongly supports the safety of bottled water, baby food and infant formula products. [Canada NewsWire](http://search.proquest.com.login.ezproxy.library.ualberta.ca/pubidlinkhandler/sng/pubtitle/Canada+NewsWire/$N/11327/DocView/455101456/fulltext/$B/1?accountid=14474) (Ottawa, On.) 2009 07 10.
      212. Unknown author. Pollution increases cancer risk for unborn children. CCPA Monitor. 2005;12(3): 31.
      213. Unknown author. Second major Canadian retailer stops selling bisphenol A bottles. [Canada NewsWire](http://search.proquest.com.login.ezproxy.library.ualberta.ca/pubidlinkhandler/sng/pubtitle/Canada+NewsWire/$N/11327/DocView/455388494/fulltext/$B/1?accountid=14474) (Ottawa, On.) 2007 12 18.
      214. Unknown author. Study finds high levels of asbestos in Quebec mining town of Thetford Mines. [The Canadian Press](http://search.proquest.com.login.ezproxy.library.ualberta.ca/pubidlinkhandler/sng/pubtitle/The+Canadian+Press/$N/38907/DocView/360000383/fulltext/$B/1?accountid=14474) (Toronto, On.) 2007 11 07.
      215. Unknown author. The Juvenile Products Manufacturers Association Responds to Health Canada's Report on Bisphenol A. Canada NewsWire (Ottawa, On.) 2008 04 18.
      216. Unknown author. Toys 'R' Us removes Hamco bibs from shelves; Chinese-Made Products Found To Contain Lead. [National Post](http://search.proquest.com.login.ezproxy.library.ualberta.ca/pubidlinkhandler/sng/pubtitle/National+Post/$N/45458/DocView/330768065/fulltext/$B/1?accountid=14474) (Don Mills, On.) 2007 08 18.
      217. Unknown author. Unprecedented coalition of 18 health and environment groups band together to support BC ban on lawn and garden chemicals. [Canada NewsWire](http://search.proquest.com.login.ezproxy.library.ualberta.ca/pubidlinkhandler/sng/pubtitle/Canada+NewsWire/$N/11327/DocView/455109958/fulltext/$B/1?accountid=14474) (Ottawa, On.) 2010 01 14.
      218. Van Esterik. Are media putting infants at risk? Women & Environments International Magazine (Toronto, On.) 2004;Spring.
      219. Valera, Dewailly & Poirier: Association between methylmercury and cardiovascular risk factors in a native population of Quebec (Canada): A retrospective evaluation. [*Environ Res.*](http://www.ncbi.nlm.nih.gov/pubmed/?term=Association+between+methylmercury+and+cardiovascular+risk+factors+in+a+native+population+of+Quebec+(Canada)%3A+A+retrospective+evaluation) 2013;120: 102-108.
      220. Valera et al: Cardiac autonomic activity and blood pressure amoung Inuit children exposed to mercury. [*Neurotoxicology.*](http://www.ncbi.nlm.nih.gov/pubmed/23227484)2012;33(5): 1067-1074.
      221. Van Horssen. “À faire un peu de poussière:” Environmental Health and the Asbestos Strike of 1949. Labour/Le Travail (Edmonton, AB.) 2012;70: 101–132.
      222. Vanderberg: Exposure to bisphenol A in Canada: Invoking the precautionary principle. *CMAJ.* 2011;183(11): 1265-1270.
      223. Wang et al: Halobenzoquinones in Swimming Pool Waters and Their Formation from personal care products. [*Environ Sci Technol.*](http://www.ncbi.nlm.nih.gov/pubmed/?term=Halobenzoquinones+in+Swimming+Pool+Waters+and+Their+Formation+from+Personal+Care+Products)2013;47(7): 3275-3282.
      224. Wanigaratne et al. Estimating cancer risk in relation to tritium exposure from routine operation of a nuclear-generating station in Pickering, Ontario. [*Chronic Dis Inj Can.*](http://www.ncbi.nlm.nih.gov/pubmed/?term=Estimating+cancer+risk+in+relation+to+tritium+exposure+from+routine+operation+of+a+nuclear-generating+station+in+Pickering%2C+Ontario) 2013;33(4): 247-56.
      225. Weeks. Bans highlight bigger problems. [The Globe and Mail](http://search.proquest.com.login.ezproxy.library.ualberta.ca/pubidlinkhandler/sng/pubtitle/The+Globe+and+Mail/$N/46323/DocView/382730355/fulltext/$B/1?accountid=14474) (Toronto, On.) 2008 04 28.
      226. Weichenthal: Selected physiological effects of ultrafine particles in acute cardiovascular morbidity. *Environmental Research.* 2012;115: 26–36.
      227. Weichenthal et al: A randomized double-blind crossover study of indoor air filtration and acute changes in cardiorespiratory health in a First Nations community. *Indoor Air.* 2013;23: 175–184.
      228. Wheeler et al: Windsor, Ontario exposure assessment study: Design and methods validation of personal, indoor, and outdoor air pollution monitoring. *J. Air & Waste Manage. Assoc.* 2011;61: 324–338.
      229. White. Critics brand asbestos as Canada's latest global sin. Postmedia News (Don Mills, On.) 2011 12 28.
      230. White, Oliffe & Bottorff: Fatherhood, smoking, and secondhand smoke in North America: A historical analysis with a view to contemporary practice. [*Am J Mens Health.*](http://www.ncbi.nlm.nih.gov/pubmed/?term=Fatherhood%2C+Smoking%2C+and+Secondhand+Smoke+in+North+America%3A+An+Historical+Analysis+With+a+View+to+Contemporary+Practice) 2012;6(2): 146-155.
      231. Wine, Osornio-Vargas & Buka: Fish consumption by children in Canada: Review of evidence, challenges and future goals. *Paediatrics & Child Health*. 2012;17(5): 241-245.
      232. Wong & Lye: Lead, mercury and cadmium levels in Canadians. [*Health Rep.*](http://www.ncbi.nlm.nih.gov/pubmed/?term=Lead%2C+mercury+and+cadmium+levels+in+Canadians)2008;19(4): 31-36.
      233. Wordsworth. Sarnia, A Community in Trauma. Women & Environments International Magazine (Toronto, On.) 2012;90/91: 31.
      234. Wordsworth. & Armstrong. Risks of Exposure to Environmental Contaminants During Pregnancy. Women & Environments International Magazine (Toronto, On.) 2009;80/81: 26.
      235. World Health Organization. [Internet] Global Plan of Action for Children’s Health and the Environment. [cited 2014 October 10]. Available from: <http://www.who.int/ceh/en/>
      236. World Health Organization. [Internet] [cited 2016 April 24]. Available from: <http://search.who.int/>
      237. World Health Organization. [Internet] [cited 2016 September 9]. Available from: http://www.who.int/ceh/risks/ewaste/en/
      238. Yang, Decker & Kramer: Exposure to parental smoking and child growth and development: a cohort study. [*BMC Pediatr.*](http://www.ncbi.nlm.nih.gov/pubmed/23842036) 2013;13:104.
